# 1 **Coexistence of multiple endemic and pandemic lineages of the rice** 2 **blast pathogen**

3 Pierre Gladieux<sup>1</sup>, Sébastien Ravel<sup>2</sup>, Adrien Rieux<sup>3</sup>, Sandrine Cros-Arteil<sup>1</sup>, Henri Adreit<sup>2</sup>,  
4 Joëlle Milazzo<sup>2</sup>, Maud Thierry<sup>2</sup>, Elisabeth Fournier<sup>1</sup>, Ryohei Terauchi<sup>4</sup>, Didier Tharreau<sup>2</sup>

5 <sup>1</sup>INRA, UMR BGPI, Montpellier, France; <sup>2</sup>CIRAD, UMR BGPI, Montpellier, France; <sup>3</sup>CIRAD, UMR PVBMT, St  
6 Pierre de la Reunion, France; <sup>4</sup>Iwate Biotechnology Research Center, Kitakami, Iwate, Japan

## 7 8 **Abstract**

9 The rice blast fungus *Magnaporthe oryzae* (syn. *Pyricularia oryzae*) is both a threat to global food  
10 security and a model for plant pathology. Molecular pathologists need an accurate understanding  
11 of the origins and line of descent of *M. oryzae* populations, to identify the genetic and functional  
12 bases of pathogen adaptation, and to guide the development of more effective control strategies.  
13 We used a whole-genome sequence analysis of samples from different times and places to infer  
14 details about the genetic makeup of *M. oryzae* from a global collection of isolates. Analyses of  
15 population structure identified six lineages within *M. oryzae*, including two pandemic on japonica  
16 and indica rice, respectively, and four lineages with more restricted distributions. Tip-dating  
17 calibration indicated that *M. oryzae* lineages separated about a millenium ago, long after the initial  
18 domestication of rice. The major lineage endemic to continental Southeast Asia displayed  
19 signatures of sexual recombination and evidence of DNA acquisition from multiple lineages. Tests  
20 for weak natural selection revealed that the pandemic spread of clonal lineages entailed an  
21 evolutionary 'cost', in terms of the accumulation of deleterious mutations. Our findings reveal the  
22 coexistence of multiple endemic and pandemic lineages with contrasting population and genetic  
23 characteristics within a widely distributed pathogen.

## 24 **Importance**

25 The rice blast fungus *Magnaporthe oryzae* (syn. *Pyricularia oryzae*) is a textbook example of a  
26 rapidly adapting pathogen, and is responsible for one of the most damaging diseases of rice.  
27 Improvements in our understanding of *Magnaporthe oryzae* diversity and evolution are required, to

28 guide the development of more effective control strategies. We used genome sequencing data for  
29 samples from around the world to infer the evolutionary history of *M. oryzae*. We found that *M.*  
30 *oryzae* diversified about a thousand years ago ago, separating into six main lineages: two  
31 pandemic on japonica and indica rice, respectively, and four with more restricted distributions. We  
32 also found that a lineage endemic to continental Southeast Asia displayed signatures of sexual  
33 recombination and the acquisition of genetic material from multiple lineages. This work provides a  
34 population-level genomic framework for defining molecular markers for the control of rice blast and  
35 investigations of the molecular basis of differences in pathogenicity between *M. oryzae* lineages.

36

## 37 **Introduction**

38 Fungal plant pathogens provide many examples of geographically widespread, often clonal,  
39 lineages capable of adapting rapidly to anthropogenic changes, such as the use of new fungicides  
40 or resistant varieties, despite extremely low levels of population genetic diversity [1, 2]. An  
41 accurate characterization of the population biology and evolutionary history of these organisms is  
42 crucial, to understand the factors underlying their emergence and spread, and to provide new,  
43 powerful and enduring solutions to control these factors. A knowledge of the origins and lines of  
44 descent connecting extant pathogen population provides insight into the pace and mode of disease  
45 emergence and subsequent dispersal [2, 3]. By inferring the history and structure of pathogen  
46 populations, we can also identify disease reservoirs and improve our understanding of the  
47 transmissibility and longevity of populations [4, 5]. Finally, quantification of the amount and  
48 distribution of genetic variation across space and time provides a population-level genomic  
49 framework for defining molecular markers for pathogen control and for investigations of the  
50 molecular basis of differences in phenotype and fitness between divergent pathogen lineages.

51 Rice blast is one of the most damaging rice disease worldwide [6-8]. It is caused by the  
52 ascomycete fungus *Magnaporthe oryzae* (syn. *Pyricularia oryzae*), which has become a model for  
53 plant pathology in parallel with the development of rice as a model crop species [7, 9-11]. The rice-  
54 infecting lineage of *M. oryzae* coexists with multiple host-specialized and genetically divergent  
55 lineages infecting other cereals and grasses [12-14]. The lineage infecting foxtail millet (*Setaria*

56 *italica*, referred to hereafter as “Setaria”) is the closest relative of the rice-infecting lineage and rice  
57 blast was, thus, thought to have emerged following a host shift from Setaria about 2500 to 7500  
58 years ago [15], at a time when Setaria was the preferred staple in East Asia [16, 17]. *Magnaporthe*  
59 *oryzae* infects the two major subspecies of rice, *Oryza sativa* ssp. *indica* and *japonica* (referred to  
60 hereafter as “indica” and “japonica”, respectively). Population genomics studies have provided  
61 support for a model in which *de novo* domestication occurred only once, to generate the japonica  
62 lineage, which subsequently diverged into temperate and tropical japonica, with introgressive  
63 hybridization from japonica leading to domesticated indica [18-20]. Using microsatellite markers,  
64 Saleh et al. [21] identified multiple endemic and pandemic genetic pools of rice-infecting strains,  
65 but were unable to resolve the evolutionary relationships between them. Rice blast has proved  
66 able to adapt rapidly to varietal resistance, and is thus a dynamic threat to such resistance in rice  
67 agrosystems [22]. This ability to adapt is surprising given the low level of diversity in *M. oryzae* and  
68 its infertility or asexual mode of reproduction in most rice-growing areas [22, 23]. This pathogen is,  
69 thus, particularly exposed to the “cost of pestification” (by analogy to the cost of domestication [24-  
70 27]), according to which, the combination of a small effective population size, strong selection for  
71 pestification genes and a lack of recombination lead to the accumulation of deleterious mutations  
72 [28]. Potential limitations to adaptation could be counterbalanced by boom-and-bust cycles in *M.*  
73 *oryzae*, with adaptation occurring during the boom phases, when short-term effective population  
74 size is large [2, 29]. Adaptive mutations may also be introduced by cryptic genetic exchanges with  
75 conspecifics or heterospecifics [30-33], but these mechanisms remain to be investigated in natural  
76 populations of *M. oryzae* [34]. An accurate understanding of the population genetics of successful  
77 clonal fungal pathogens, such as *M. oryzae*, can provide important insight into the genomic and  
78 eco-evolutionary processes underlying pathogen emergence and adaptation to anthropogenic  
79 changes.

80 We used pathogenicity data and whole-genome resequencing data for *M. oryzae* samples  
81 distributed over time and space, to address the following questions: What population structure  
82 does *M. oryzae* display? Does this species consist of relatively ancient or recent clonal lineages?  
83 What is history of temperate japonica, tropical japonica and indica japonica rice colonization by *M.*

84 *oryzae*? Do *M. oryzae* lineages display differences in pathogenicity toward rice subspecies? Can  
85 we identify genetic exchanges between rice-infecting lineages and which genomic regions have  
86 been exchanged? Is there evidence for a cost of pestification in terms of the accumulation of  
87 deleterious mutations?

## 88 **Results**

89 **Genome sequencing and SNP calling.** We elucidated the emergence, diversification and spread  
90 of *M. oryzae* in rice agrosystems, by studying genome-wide variation across geographically  
91 widespread samples. We used 25 and 18 genomes sequenced by Illumina single-end and paired-  
92 end read technologies, respectively, with seven published genome sequences obtained with  
93 Solexa and mate-pair Titanium methods [10, 12]. We thus had a total of 50 genomes available for  
94 analysis (Table S1). Forty-five of the isolates concerned originated from cultivated rice (*Oryza*  
95 *sativa*), four from cultivated barley (*Hordeum vulgare*), and one from foxtail millet (*Setaria italica*).  
96 The sample set included multiple samples from geographically separated areas (North and South  
97 America, South, Southeast and East Asia, sub-Saharan Africa, Europe and the Mediterranean  
98 area), the reference laboratory strain 70-15 and its parent GY11 from French Guiana. Nine  
99 samples were collected from tropical japonica rice, seven from temperate japonica, fifteen from  
100 indica, and three from hybrid elite varieties. Sequencing reads were mapped onto the 41.1 Mb  
101 reference genome 70-15. Mean sequencing depth ranged from 5x to 64x for genomes sequenced  
102 with single-end reads, and from 5x to 10x for genomes sequenced with paired-end reads (Table  
103 S1). SNP calling identified 182,804 biallelic single-nucleotide polymorphisms (SNPs) distributed  
104 over seven chromosomes. The dataset consisted of 95,925 SNPs, excluding the *Setaria*-infecting  
105 lineage, 61,765 of which had less than 30% missing data, and 16,370 of which had no missing  
106 data.

107 **Population subdivision, genealogical relationships and levels of genetic variation.** We used  
108 a multivariate analysis of population subdivision method, rather than model-based clustering  
109 algorithms, because multivariate methods require no assumptions about outcrossing, random  
110 mating or linkage equilibrium within clusters, and previous studies have shown that, in many

111 populations, *M. oryzae* has lost its sexual recombination capacity ([21-23] and references therein).  
112 We used a discriminant analysis of principal components to determine the number of lineages  
113 represented in our dataset. Progressively increasing the number of clusters  $K$  from two to five  
114 identified the four lineages previously described by Saleh et al. in Asia [21] on the basis of  
115 microsatellite data, and a cluster of three strains collected from the Yunnan and Hunan Provinces  
116 of China (Figure 1). Further increases in  $K$  led to the subdivision of this Yunnan/Hunan cluster.  
117 Barley-infecting isolates clustered within rice-infecting lineage 1, confirming previous phylogenetic  
118 studies [12, 13]. Barley is “universally susceptible” to rice-infecting isolates, at least in laboratory  
119 conditions. However, the barley isolates included in this study were collected in Thailand, and no  
120 major blast epidemic has since been reported on this host in this area, indicating that barley is a  
121 minor host for rice-infecting populations.

122 We investigated whether the clusters observed at  $K>4$  in the DAPC represented new independent  
123 lineages or subdivisions of the main clusters, by using RAXML to infer a genome genealogy [35].  
124 We based the analysis on a dataset combining the full set of SNPs and monomorphic sites, rather  
125 than just SNPs, to increase topological and branch length accuracy [36]. The total-evidence  
126 genealogy revealed the existence of four lineages, corresponding to lineages 1 to 4 described by  
127 Saleh et al. [21], and two new lineages (named lineages 5 and 6) corresponding to the three-  
128 individual cluster observed at  $K=5$  in the DAPC (Figure 1). With the 41 Mb dataset, including  
129 missing data, the most basal divergence within the rice-infecting lineage was that between lineage  
130 1 and the other five lineages (Figure 1). If positions with missing data were excluded (15 Mb), the  
131 most basal divergence was that between a group composed of lineages 1, 2 and 6, and a group  
132 composed of lineages 3, 4 and 5 (not shown).

133 Absolute divergence ( $d_{xy}$ ) between pairs of lineages was of the order of  $10^{-4}$  differences per base  
134 pair and was highest in comparisons with lineage 6 (Table S2). Nucleotide diversity within lineages  
135 was an order of magnitude smaller than divergence in lineages 2 to 4 ( $\theta_w$  per site:  $5.2e-5$  to  $7.2e-5$ ,  
136  $\pi$  per site:  $4.5e-5$  to  $4.9e-5$ ) and was highest in lineage 1 ( $\theta_w$  per site:  $2.3e-4$ ;  $\pi$  per site:  $2.1e-4$ )  
137 (Table 1). Tajima’s  $D$  was negative in all lineages, indicating an excess of low-frequency  
138 polymorphism, and values were closer to zero in lineages 1 and 4 ( $D=-0.56$  and  $D=-0.82$ ,

139 respectively) than in lineages 2 and 3 ( $D=-1.45$  and  $D=-1.72$ ). The same differences in levels of  
140 variability across lineages, and individual summary statistics of the same order of magnitude, were  
141 observed if missing data were excluded from computations.

142 Table 1. Summary of population genomic variation in non-overlapping 100 kb windows

| Lineage | $n$ | S    | K   | $H_e$ | $\theta_w$ | $\pi$    | D        |        |
|---------|-----|------|-----|-------|------------|----------|----------|--------|
| 1       | 10  | 57.6 | 3.6 | 0.31  |            | 2.25E-04 | 2.11E-04 | -0.558 |
| 2       | 14  | 19.7 | 7.2 | 0.20  |            | 6.94E-05 | 4.92E-05 | -1.454 |
| 3       | 16  | 21.5 | 7.9 | 0.17  |            | 7.24E-05 | 4.53E-05 | -1.718 |
| 4       | 6   | 10.5 | 4.3 | 0.38  |            | 5.15E-05 | 4.52E-05 | -0.824 |

143  
144 Lineages 5 and 6 were not included in calculations because the sample sizes for these lineages were too  
145 small ( $n=2$  and  $n=1$ , respectively);  $n$  is sample size;  $\theta_w$  is Watterson's  $\theta$  per bp;  $\pi$  is nucleotide diversity per  
146 bp;  $H_e$  is haplotype diversity; K is the number of haplotypes; D is Tajima's neutrality statistic.

147 **Footprints of natural selection and the cost of pestification.** We tested for standard neutral  
148 molecular evolution by the McDonald-Kreitman method, based on genome-wide patterns of  
149 synonymous and nonsynonymous variation (Table 2). The null hypothesis could be rejected for all  
150 four lineages ( $p<0.0001$ ). The neutrality index, which quantifies the direction and degree of  
151 departure from neutrality, was greater than 1, indicating an excess of amino-acid polymorphism.  
152 This pattern suggests that lineages 1 to 4 accumulated slightly deleterious mutations during  
153 divergence from the *Setaria*-infecting lineage. Under near- neutrality, the ratio of nonsynonymous  
154 to synonymous nucleotide diversity  $\pi_N/\pi_S$  provides an estimate of the proportion of effectively  
155 neutral mutations that are strongly dependent on effective population size  $N_e$  [37]. The  $\pi_N/\pi_S$  ratio  
156 ranged from 0.43 in lineage 1 to 0.61 in lineage 4, and was intermediate in lineages 2 and 3  
157 ( $\pi_N/\pi_S=0.49$ ), and the ratio of nonsense (i.e premature stop codons) to sense nonsynonymous  
158 mutations ( $P_{\text{nonsense}}/P_{\text{sense}}$ ) followed the same pattern. Overall, the  $\pi_N/\pi_S$  and  $P_{\text{nonsense}}/P_{\text{sense}}$  ratios  
159 obtained suggest a higher proportion of slightly deleterious mutations segregating in lineage 4,  
160 and, to a lesser extent, in lineages 2 and 3, than in lineage 1. Assuming identical mutation rates,

161 we can estimate that the long-term population size of lineage 1 ( $\pi_S=0.00018/\text{bp}$ ) was 2.5 to 3 times  
 162 greater than that of the other lineages, consistent with the effect of  $N_e$  on the efficacy of negative  
 163 selection predicted under near-neutrality.

164 Table 2. McDonald-Kreitman tests based on genome-wide patterns of synonymous and non  
 165 synonymous variation, and measurements of the genome-wide intensity of purifying selection.  
 166 Divergence was measured against predicted gene sequences of the *Setaria*-infecting  
 167 *Magnaporthe oryzae* isolate US71.

| Lineage | $\pi_N/\pi_S$          | $P_{\text{nonsense}}/P_{\text{sense}}$ | $P_n/P_s$        | $D_n/D_s$          | NI    |
|---------|------------------------|----------------------------------------|------------------|--------------------|-------|
| 1       | 0.43 (0.00041/0.00018) | 0.011 (49/4244)                        | 1.23 (4293/3492) | 0.70 (16444/23656) | 1.77* |
| 2       | 0.49 (0.00012/0.00006) | 0.022 (36/1622)                        | 1.52 (1658/1088) | 0.72 (15565/21745) | 2.13* |
| 3       | 0.49 (0.00015/0.00007) | 0.018 (32/1814)                        | 1.17 (1846/1578) | 0.97 (14789/15293) | 1.21* |
| 4       | 0.61 (0.00012/0.00007) | 0.034 (31/914)                         | 1.59 (945/593)   | 0.72 (15302/21347) | 2.22* |

168  $\pi_N/\pi_S$  is the ratio of nonsynonymous to synonymous nucleotide diversity. Under near-neutrality,  $\pi_N/\pi_S$   
 169 provides an estimate of the proportion of effectively neutral mutations strongly dependent on effective  
 170 population size  $N_e$ .  $\pi_S$  is a proxy for  $N_e$ .  $P_{\text{nonsense}}/P_{\text{sense}}$  is the number of nonsynonymous nonsense mutations  
 171 (i.e., 'premature' stop codon) divided by the number of nonsynonymous sense mutations. \* $P$ -value<0.0001,  
 172 chi-square tests of independence. The neutrality index  $NI=(P_n/P_s)/(D_n/D_s)$  determines the direction and  
 173 degree of departure from neutrality.  $NI=1$  if nonsynonymous mutations are neutral or strongly deleterious.  $NI$   
 174 < 1 indicates amino-acid substitutions and implies that advantageous mutations have fixed.  $NI > 1$  indicates  
 175 an excess of amino-acid polymorphism, as expected in a context of slightly deleterious mutations.  
 176

177

178 **Distribution and reproductive biology of *M. oryzae* lineages.** The strains of lineages 1 and 2  
 179 originated from rainfed upland rice, including rice grown in experimental fields. Lineage 2 was  
 180 exclusively associated with tropical and temperate japonica, whereas lineage 1 was sampled from  
 181 barley, tropical japonica and hybrid rice varieties (Table S1; Figure 1). Lineage 1 was restricted to  
 182 continental Southeast Asia (Laos, Thailand, Yunnan). The reference laboratory strain GY-11

183 (=Guy11) was collected in French Guiana, from fields cultivated by Hmong refugees, who fled  
184 Laos in the 1970s. Lineage 2 was pandemic, and included all the European samples.

185 Lineage 3 and 4 samples originated from irrigated or rainfed upland/lowland rice. They were mostly  
186 associated with indica rice, with two samples collected from hybrid varieties and one collected from  
187 tropical japonica (Table S1; Figure 1). Lineage 3 was pandemic and included all sub-Saharan  
188 Africa samples, whereas lineage 4 was found on the Indian subcontinent, in Zhejiang (China) and  
189 the USA. Lineages 5 and 6 were collected from indica and tropical japonica varieties of rainfed  
190 upland rice in Yunnan and Hunan (China), respectively.

191 Lineages 2, 3 and 4 displayed low rates of female fertility (20%, 0%, 0%, respectively), and a  
192 significant imbalance in mating-type ratio (frequency of Mat-1: 100%, 14.3% and 100%,  
193 respectively; Chi<sup>2</sup> test,  $P < 0.001$ ), whereas lineage 1 had a female fertility of 88.9% and a non-  
194 significant imbalance in mating type ratio (frequency of Mat-1: 33.3%; Chi<sup>2</sup> test,  $P = 0.083$ ). Lineage  
195 5 was Mat-1 and only one of the two strains was female-fertile (no data for lineage 6).

196 **Pathogen compatibility range.** Gallet et al. [38] analyzed the range of compatibility, in terms of  
197 the qualitative success of infection, between 31 *M. oryzae* isolates and 57 rice genotypes.  
198 Analyses of variance revealed a pattern of host-pathogen compatibility strongly structured by the  
199 host of origin of the isolates (i.e. the rice subspecies from which samples were collected). We  
200 investigated whether the compatibility between rice hosts and *M. oryzae* isolates was also  
201 structured by the lineage of origin of the isolates, by supplementing the dataset published by Gallet  
202 et al. [38] with pathotyping data for 27 isolates. We added microsatellite data to the SNP data, to  
203 overcome the absence of sequence data for 28 isolates, and we used clustering methods to  
204 confidently assign 46 of the 58 isolates with pathotyping data to identified lineages (no isolates  
205 could be assigned to lineage 5 or 6, see *Methods*). The final pathogenicity dataset included 46  
206 isolates from lineages 1 to 4, inoculated onto 38 tropical japonica, temperate japonica, and indica  
207 varieties and 19 differential varieties with known resistance genes (Table S3).

208 Infection success (binary response) was analyzed with a generalized linear model. An analysis of  
209 the proportion of compatible interactions revealed significant effects of rice subspecies, pathogen



210 lineage and the interaction between them (Table S4). The lineage effect could be explained by  
211 lineage 2 having a lower infection frequency than lineage 1 (comparison of lineages 1 and 2;  $z$ -  
212 value=-2.779;  $p$ -value=0.005) and lineage 3 having a higher infection frequency than lineage 1  
213 (comparison of lineages 3 and 1;  $z$ -value=2.683;  $p$ -value=0.007), whereas the infection frequency  
214 of lineage 4 was not significantly different from that of lineage 1 (comparison of lineages 4 and 1;  
215  $z$ -value=1.121;  $p$ -value=0.262). The rice subspecies effect could be attributed to tropical japonica  
216 varieties having a wider compatibility range than indica varieties (comparison of tropical japonica  
217 and indica;  $z$ -value=1.793;  $p$ -value=0.073), and temperate japonica having a wider compatibility  
218 range than indica varieties (comparison of temperate japonica and indica;  $z$ -value=1.830;  $p$ -  
219 value=0.067). The significant interaction between rice subspecies and pathogen lineage indicates  
220 that the effect of the lineage of origin of the isolate on the proportion of compatible interactions  
221 differed between the three rice subspecies. This interaction effect can be attributed to pathogen  
222 specialization on indica and tropical japonica, with lineage 1 (mostly originating from tropical  
223 japonica or from areas in which tropical japonica is grown) infecting tropical japonica varieties more  
224 frequently than indica varieties, lineage 2 (the lineage sampled from temperate japonica) infecting  
225 temperate japonica varieties more frequently than other varieties, lineages 3 and 4 (mostly  
226 originating from indica varieties) infecting indica varieties more frequently than tropical japonica  
227 varieties, and all four lineages infecting temperate japonica varieties at relatively high frequencies  
228 (Table S4; Figure 2A).

229 Major resistance (R) genes can be a major determinant of pathogen host range, and promote  
230 divergence between pathogen lineages by exerting strong divergent selection on a limited number  
231 of pathogenicity-related genes [39-41]. We investigated the possible role of major resistance (R)  
232 genes in the observed differences in compatibility between rice subspecies and pathogen lineages,  
233 by challenging 19 differential varieties with the 46 isolates assigned to lineages 1 to 4. An analysis  
234 of the number of R genes overcome revealed a significant effect of pathogen lineage (Table S5).  
235 This effect was driven mostly by lineage 2, which overcame fewer R genes than the other lineages  
236 (Table S5; Figure 2B).

237 **Recombination within and between lineages.** We visualized evolutionary relationships, while  
 238 taking into account the possibility of recombination within or between lineages, using the  
 239 phylogenetic network approach Neighbor-Net, as implemented in SPLITSTREE 4.13 [42]. Neighbor-  
 240 Net is an agglomerative method that generates planate split graph representations. A *split* is a  
 241 partitioning of the dataset, and a collection of splits is considered *compatible* if they fall within the  
 242 set of splits of a tree. Gene genealogies represent compatible collections of splits, whereas  
 243 Neighbor-Net can be used to visualize conflicting phylogenetic signals, represented by network  
 244 reticulation, through a condition weaker than compatibility. The Neighbor-Net network inferred from  
 245 the set of 16,370 SNPs without missing data presented a non tree-like structure of the inner  
 246 connections between lineages, consistent with genetic exchanges between unrelated isolates or  
 247 incomplete lineage sorting (Figure 3). Greater network reticulation was observed between lineages  
 248 1, 5 or 6 and the other lineages than between these other lineages themselves. Lineages 2 to 4  
 249 had long interior branches and star-like topologies, consistent with long-term clonality.

250 Table 3. Estimates of the population recombination rate  $\rho$ , tests of recombination based on  
 251 homoplasy and linkage disequilibrium, proportion of homoplastic SNPs

| Lineage | $\rho$ (crossovers/Mb/generation) |      |       |     |      |       |       |       | Homoplastic SNPs | PHI test ( $p$ -value) |
|---------|-----------------------------------|------|-------|-----|------|-------|-------|-------|------------------|------------------------|
|         | Chromosomes                       |      |       |     |      |       |       |       |                  |                        |
|         | 1                                 | 2    | 3     | 4   | 5    | 6     | 7     | Mean  |                  |                        |
| 1       | 8.6*                              | 3.8* | 15.1* | 1.4 | 8.5* | 10.6* | 13.5* | 10.57 | 34.56 %          | 0.0000                 |
| 2       | 0.0                               | 0.2  | 0.2*  | 0.3 | 0.6  | 0.5   | 0.3   | 0.28  | 0.09 %           | 0.0944                 |
| 3       | 0.4*                              | 0.2* | 0.0   | 0.0 | 0.0  | 0.0   | 0.0   | 0.01  | 0.47 %           | 0.0535                 |
| 4       | 0.2                               | 0.2* | 0.3   | 0.4 | 0.4  | 0.4   | 0.4   | 0.33  | 0.40 %           | 0.0014                 |

252  
 253 \* $P < 0.05$ . PHI test assesses pairwise homoplasy. The null hypothesis of no recombination was tested, for the  
 254 PHI test and for  $\rho$ , using random permutations of the positions of the SNPs based on the expectation that  
 255 sites are exchangeable if there is no recombination. For the  $\rho$  test, significance was determined from the  
 256 distribution of maximum composite likelihood values calculated from permuted data.

257

258 We evaluated the amount of recombination within lineages, by estimating the population  
259 recombination parameter ( $\rho=2N_e r$ ) and testing for the presence of recombination with a likelihood  
260 permutation test implemented in the PAIRWISE program in LDHAT. Recombination analyses  
261 confirmed the heterogeneity between lineages of the contribution of recombination to genomic  
262 variation, with recombination rates averaged across chromosomes being more than two to three  
263 orders of magnitude higher in lineage 1 (10.57 crossovers/Mb/generation) than in other lineages  
264 (lineage 2: 0.28; lineage 3: 0.01; lineage 4: 0.33 crossovers/Mb/generation) (Table 3). SPLITSTREE  
265 analyses displaying the reticulations within each lineage and testing for recombination with the PHI  
266 test were consistent with this pattern (Table 3; Figure 3; Figure S1). The null hypothesis of no  
267 recombination was rejected only for lineages 1 and 4 [43].

268 Differences in recombination-based variation between lineages were confirmed by analyses of  
269 homoplasmy (Table 3). Homoplastic sites display sequence similarities that are not inherited from a  
270 common ancestor, instead resulting from independent events in different branches. Homoplasmy  
271 can result from recurrent mutations or recombination, and the contribution of recombination to  
272 homoplasmy is expected to predominate in outbreeding populations. Homoplastic sites were  
273 identified by mapping mutations onto the total-evidence genome genealogy with the 'Trace All  
274 Characters' function of MESQUITE [44], applying ancestral reconstruction under the maximum  
275 parsimony optimality criterion. The resulting matrix of ancestral states for all nodes was then  
276 processed with a python script, to determine the number of mutations that had occurred at each  
277 site within each lineage, counting sites displaying multiple substitutions across the tree as  
278 homoplastic. Only 0.09%, 0.47% and 0.40% of the SNPs were homoplastic in lineages 2, 3 and 4,  
279 respectively, versus 34.6% in lineage 1 (lineages 5 and 6 were not tested due to the small sample  
280 size). The very small numbers of homoplastic sites in lineages 2, 3 and 4 suggest that these  
281 lineages are largely clonal, whereas the high level of homoplasmy detected in lineage 1 is consistent  
282 with repeated recombination events between the strains of this lineage.

283 We assessed the genomic impact of recombination, by analyzing patterns of linkage disequilibrium  
284 (LD), corresponding to the tendency of different alleles to occur together in a non-random manner.

285 For lineage 1 (S=13 kSNPs), LD decayed smoothly with physical distance, reaching half its  
286 maximum value at about 10 kb, whereas, for lineages 2, 3 and 4 (S=3.7, 3.2 and 2.7 kSNPs), no  
287 LD decay pattern was observed (Figure S2). These analyses also revealed that background LD  
288 levels were no higher in lineages 2, 3, or 4, which appeared to be largely clonal, than in lineage 1.  
289 However, both simulation work and empirical data have shown that population history, including  
290 bottlenecks and admixture, strongly affects the background level of LD in the population [45].

### 291 **Genome scan for genetic exchanges between lineages**

292 We scanned the genomes for the exchange of mutations between lineages, using a method based  
293 on lineage-diagnostic SNPs and a probabilistic method of 'chromosome painting' (Figure 4). In the  
294 lineage-diagnostic SNP approach, each isolate is removed from the dataset in turn to identify  
295 SNPs specific to a particular lineage (i.e. biallelic sites displaying a mutation specific to a given  
296 lineage). Each focal isolate is then added back to the dataset and scanned for the presence of  
297 lineage-diagnostic SNPs identified in lineages other than its lineage of origin. Using this approach,  
298 we identified 515 lineage-diagnostic singletons with 276, 96 and 140 singletons in lineages 1, 5  
299 and 6, respectively, and only one singleton in lineages 2, 3 and 4. Putatively migrant singletons  
300 were assigned to all other lineages for lineages 1 and 5, and to all other lineages except lineage 1  
301 for lineage 6 (Table S6). 'Chromosome painting' is a probabilistic method for reconstructing the  
302 chromosomes of each individual sample as a combination of all other homologous sequences. We  
303 identified the migrant mutations present in each isolate, these mutations being defined as having a  
304 probability greater than 90% of having been copied from a lineage other than the lineage of origin  
305 of the focal isolate. This method uses population data from recipient populations only, and we were  
306 therefore able to include only lineages 1 to 4 in the analysis. Chromosome painting identified 464  
307 migrant mutations, all of which segregated in lineage 1. Putative migrant mutations were assigned  
308 to all five of the other lineages (92.8 mutations per lineage, on average), with lineage 2 making the  
309 largest contribution (165 mutations) and lineage 4 the smallest contribution (39 mutations).

310 The sets of putative migrant mutations identified by the two methods matched different sets of  
311 genes enriched in NOD-like receptor [46], HET-domain [47] or GO term 'lipid catabolic process'

312 (Table S6) genes. However, the presence of false positives due to the random sorting of ancestral  
313 polymorphisms in lineage 1 and other lineages cannot be excluded. We minimized the impact of  
314 the retention of ancestral mutations, by reasoning that series of adjacent mutations are more likely  
315 to represent genuine gene exchange events. We identified all the genomic regions defined by  
316 three adjacent putative migrant mutations originating from the same donor lineage. We searched  
317 for such mutations among the set of putative migrant mutations identified by the two methods. We  
318 identified 12 such regions in total, corresponding to 1917 genes. Functional enrichment tests for  
319 each recipient isolate revealed enrichment in the GO term 'pathogenesis' for isolate CH999, the  
320 GO term 'phosphatidylinositol biosynthetic process' for isolate TH17 and the GO term 'telomere  
321 maintenance' for isolate CH1019 (Table S6).

322 **Molecular dating.** We investigated the timing of rice blast emergence and diversification, by  
323 performing Bayesian phylogenetic analyses with BEAST. Isolates were collected from 1967 to 2009  
324 (Table S1), making it possible to use a tip-based calibration approach to estimate evolutionary  
325 rates and ancestral divergence times together. We analyzed the linear regression of sample age  
326 against root-to-tip distance (i.e. the number of substitutions separating each sample from the  
327 hypothetical ancestor at the root of the tree). The temporal signal obtained in this analysis was  
328 strong enough for thorough tip-dating inferences (Figure S3) [48]. We therefore used tip-dating to  
329 estimate the rate at which mutations accumulate (i.e. the substitution rate) and the age of every  
330 node in the tree, including the root (i.e. time to the most recent common ancestor), simultaneously.  
331 At the scale of the genome, the mean substitution rate was estimated at  $1.98e-8$   
332 substitutions/site/year (Figure S3). The six rice-infecting lineages were estimated to have  
333 diversified ~900 to ~1300 years ago (95% HPD [175-2700] years ago) (Figure 5). Bootstrap node  
334 support was strong and similar node age estimates were obtained when the recombining lineage 1  
335 and the potentially recombining lineages 5 and 6 (not shown) were excluded, indicating the limited  
336 effect of recombination on our inferences. We also inferred that the ancestor of rice-infecting and  
337 *Setaria*-infecting lineages lived ~9,800 years ago. However, the credibility intervals were relatively  
338 large (95% HPD [1200-22,000] years ago), covering the period from japonica rice domestication  
339 and *Setaria* domestication to the last glacial maximum, and overlapping with previous estimates

340 suggesting that the rice- and *Setaria*-infecting lineages diverged shortly after rice domestication, or  
341 even during the period of rice domestication (range of point estimates in ref [15]: 2500 to 7300  
342 years ago).

## 343 Discussion

344 We performed a whole-genome sequence analysis of 50 isolates with different temporal and  
345 spatial distributions, to elucidate the emergence, diversification and spread of *M. oryzae* as a  
346 rapidly evolving pathogen with a devastating impact on rice agrosystems. Analyses of population  
347 subdivision confirmed the four lineages previously identified by Saleh et al. [21]. Previous analyses  
348 of microsatellite data were unable to resolve the genealogical relationships between clusters or to  
349 capture the phylogenetic depth of population subdivision within *M. oryzae*. By contrast, our  
350 population genomic analyses of resequencing data revealed weak divergence between clusters  
351 (absolute divergence  $d_{xy}$  of the order of  $10^{-4}$  differences per base pair), consistent with recent  
352 diversification. Phylogenetic analyses using sampling dates for calibration confirmed the recent  
353 origin of the six lineages, with estimates of divergence time ranging from ~900 to ~1300 years ago  
354 (95% credible intervals [175-2700] years ago). Lineage 1 (which includes the reference strains  
355 GY11 and 70-15) was found in mainland Southeast Asia and originates from barley, tropical  
356 japonica or undetermined varieties. All isolates from lineages 1, 5 and 6 were collected in rainfed  
357 upland agrosystems typical of japonica rice cultivation, and pathogenicity test results were  
358 consistent with the local adaptation of lineage 1 to tropical japonica rice. Lineage 2 was pandemic  
359 in irrigated fields of temperate japonica rice outside Asia, and cross-inoculation experiments  
360 revealed specialization on this host and an ability to overcome fewer R genes, on average, than  
361 other lineages. Lineages 3 and 4 were associated with indica. Lineage 3 is pandemic, and cross-  
362 inoculation indicated local adaptation to this host, relative to tropical japonica, although lineages 3  
363 and 4 had relatively wide compatibility ranges consistent with generalism. One possible  
364 explanation of the wide compatibility range of temperate japonica varieties and the narrow  
365 compatibility range of lineage 2 is that temperate japonica varieties have smaller repertoires of R  
366 genes, as resistance to blast is of less concern to breeders in temperate irrigated conditions, which  
367 are less conducive to epidemics [38] .

368 The continental Southeast Asian lineage was the most basal in total-evidence genome  
369 genealogies, reflecting a pathway of domesticated Asian rice evolution [16, 18] in which the *de*  
370 *novo* domestication of rice occurred only once, in japonica. However, the diversification of *M.*  
371 *oryzae* into multiple rice-infecting lineages (point estimates ranging from ~900 to ~1300 years ago)  
372 appears to be much more recent than the *de novo* domestication of rice (8500-6500 years ago [16,  
373 49, 50]), the spread of rice cultivation in paddy fields, and the domestication of indica in South  
374 Asia, following introgressive hybridization from the early japonica gene pool into 'proto-indica' rice  
375 (about 4000 years ago [16, 51]). At the time corresponding to the upper bound of the 95% credible  
376 interval (2700 years ago), japonica rice and paddy-field cultivation had spread to most areas of  
377 continental and insular South, East and Southeast Asia, and indica rice was beginning to spread  
378 out of the Ganges plains [16, 52]. The point estimates for the splitting of *M. oryzae* lineages  
379 correspond to the Tang dynasty ('the Golden Age') in China, and the late classical period in India,  
380 during which food production became more rational and scientific and intensive irrigated systems  
381 of cultivation were developed, bringing about economic, demographic and material growth [53].  
382 Genome scans based on polymorphism and divergence revealed heterogeneity in the genomic  
383 and life-history changes associated with the emergence and spread of the different lineages. Using  
384 microsatellite data and a larger collection of samples, Saleh et al. [21] identified differences in  
385 variability between lineages, with similar or higher levels of genetic variability in lineages 1 and 4  
386 than in lineages 2 and 3. Lineages 1 and 4 were also the only lineages displaying biological  
387 features (fertile female rates and mating type ratios) consistent with sexual reproduction. Our  
388 genome-wide analyses of variability and linkage disequilibrium provided clear evidence that the  
389 continental Southeast Asian lineage 1 displays recombination and is genetically diverse,  
390 suggesting that sexual reproduction occurs and that long-term population size is relatively high,  
391 whereas pandemic lineages 2 and 3 are largely clonal and genetically depauperate, suggesting a  
392 lack of sexual reproduction and demographic bottlenecks associated with their emergence in  
393 agrosystems. However, population genomic analyses did not confirm the previously reported high  
394 variability and capacity for sexual recombination of the South Asia/US lineage 4 [21], possibly due  
395 to differences in sample size between studies. The null hypothesis of clonality was not rejected in  
396 PHI-tests for recombination, but both total ( $\theta_w$ ) and average ( $\pi$ ) nucleotide diversity, and the

397 population recombination rate ( $\rho$ ), were of the same order of magnitude in lineage 4 as in lineages  
398 2 and 3, consistent with a lack of recombination and a small effective population size.

399 The patterns of polymorphism and diversity at non-synonymous and synonymous sites indicated  
400 that deleterious mutations were particularly abundant in clonal lineages 2-4 of *M. oryzae*, with their  
401 smaller long-term population size, consistent with a higher cost of pestification in these lineages.  
402 The introgression of genetic elements from clonal lineages harboring greater loads of deleterious  
403 mutations may counteract the efficient purging of deleterious mutations in the recombining lineage  
404 1 from mainland Southeast Asia, and lead to smaller differences in the proportion of  
405 nonsynonymous mutations between recombining and clonal lineages. However, the extensive  
406 variability of the origin and genomic distribution of the detected putative migrant mutations  
407 suggests that most of these mutations are false-positive, with only series of adjacent mutations of  
408 this type originating from the same donor lineage corresponding to genuine genetic exchange  
409 events. Field-scale studies in areas in which different lineages coexist should provide more  
410 detailed insight into the relative importance of interlineage recombination, and make it possible to  
411 determine whether genetic exchanges are driven by positive selection or are an incidental  
412 byproduct of the sympatric coexistence of interfertile lineages. We hypothesize that the  
413 accumulation of deleterious mutations in pandemic clonal complexes and gene flow into sexual  
414 lineages during disease emergence and spread are widespread phenomena, not due to  
415 idiosyncrasies of *M. oryzae*, and we expect these patterns to hold true in other invasive fungal  
416 plant pathogens.

417 An examination of additional isolates from under-sampled geographic regions (including Africa and  
418 South America), based on sequencing approaches and sampling schemes tailored to detect  
419 adaptation from *de novo* mutations, will be required to enhance our understanding of the  
420 biogeography of *M. oryzae* and the genetic basis of adaptation in the different *M. oryzae* lineages.  
421 Nevertheless, the catalog of variants detected in our study provides a solid foundation for future  
422 research into the population genomics of adaptation in *M. oryzae*. Our work also provides a  
423 population-level genomic framework for defining molecular markers for the control of rice blast and



424 investigations of the molecular basis of the differences in phenotype and fitness between divergent  
425 lineages.

## 426 **Methods**

427 **Genome sequencing and SNP calling.** Sequencing libraries were prepared and Illumina HiSeq  
428 2500 sequencing was performed either at Beckman Coulter Genomics (Danvers, USA) or at the  
429 Iwate Biotechnological Research Center (Table S1). Genomic DNA for sequencing at BCG was  
430 isolated from 100 mg of fresh mycelium grown in liquid medium. The mycelium was treated with  
431 enzymes degrading the cell walls (mainly betaglucanase) and then incubated in lysis buffer (Triton  
432 2 X – 1% SDS - 100 mM NaCl – 10 mM Tris-HCl – 1 mM EDTA). Nucleic acids were extracted by  
433 treatment with chloroform:isoamyl alcohol (24:1), followed by precipitation overnight in isopropanol.  
434 They were then rinsed in 70% ethanol. The nucleic acid extract was treated with RNase A (0.2  
435 mg/mL final concentration) to remove RNA. The DNA was purified by another round of  
436 chloroform:isoamyl alcohol (24:1) treatment. Genomic DNA for sequencing at IBRC was isolated  
437 with a protocol adapted from the animal tissue (Mouse tail) protocol available in the Promega  
438 Wizard® Genomic DNA Purification Kit. Nucleic acids were extracted from 20 mg of fresh  
439 mycelium grown in liquid medium, which was ground into powder in liquid nitrogen, with a pre-  
440 chilled pestle and mortar. The centrifugation time specified in the mouse tail protocol was  
441 increased to 15 min, and centrifugation was carried out at 4°C, after precipitation for 3 hours at -  
442 20°C. Nucleic acids were resuspended in water, treated with RNase A (0.2 mg/mL final  
443 concentration), purified by treatment with chloroform:isoamyl alcohol (24:1), precipitated overnight  
444 in isopropanol supplemented with 0.1 volumes of sodium acetate (3 M pH = 5), and rinsed in 70%  
445 ethanol.

446 Sequencing reads were either paired-end (read length 100 nucleotides, insert size ~ 500 bp, DNAs  
447 sequenced at IBI) or single-end (read length 100 nucleotides, DNAs sequenced by BCG). Reads  
448 were trimmed to remove barcodes and adapters, and were then filtered to eliminate sequences  
449 containing ambiguous base calls. Reads were mapped against the 70-15 reference genome  
450 version 8 [10] with BWA [54] (subcommand aln, option -n 5; subcommand sampe option -a 500).  
451 Alignments were sorted with SAMTOOLS [55], and reads with a mapping quality below 30 were

452 removed. Duplicates were removed with PICARD (<http://broadinstitute.github.io/picard/>). We used  
453 REALIGNER-TARGETCREATOR, TARGETCREATOR and INDELREALIGNER within the GENOME ANALYSES  
454 TOOLKIT (GATK) [56] to define intervals to target for local realignment and for the local realignment  
455 of reads around indels, respectively, and UNIFIED GENOTYPER to call SNPs. We used GATK's  
456 SELECTVARIANTS to apply hard filters and to select high-confidence SNPs based on annotation  
457 values. Numbers of reference and alternative alleles were calculated with JEXL expressions based  
458 on the `vc.getGenotype().getAD()` command. Variants were selected based on the following  
459 parameters: counts of all reads with a MAPQ = 0 below 3.0 (MQ0 in GATK), number of reference  
460 alleles + number of alternative alleles  $\geq 15.0$ , and number of reference alleles/number of alternative  
461 alleles  $\leq 0.1$ . With these parameters, SNP calls are limited to positions with relatively high  
462 sequencing depths and limited discordance across high-quality sequencing reads. We used a  
463 second SNP caller, FREEBAYES v0.9.10-3-g47a713e [57], to assess the impact of the SNP calling  
464 method on the sets of SNPs detected, given the presence in our dataset of isolates sequenced at  
465 relatively low depth ( $<10X$ ). We set the `--min-alternate-count` option to one in FREEBAYES. When  
466 the sample-by-sample FREEBAYES SNP calls were compared with the GATK SNP calls, after  
467 filtration, FREEBAYES identified 1.63X (stdev 0.28) more SNPs per sample on average than  
468 analyses with GATK, and 92.3% (stdev 2.3) of the SNPs identified with GATK were also identified  
469 with FREEBAYES. The size of the intersection between the sets of SNPs identified by the two  
470 methods was negatively correlated with sequencing depth (i.e. the concordance between SNP  
471 callers was higher for isolates sequenced less deeply), indicating a minimal impact of isolates  
472 sequenced at lower depth on confidence in SNP calls. When the multisample FREEBAYES SNP  
473 calls were compared with the GATK SNP calls, after filtration, 83% of the SNPs identified with  
474 GATK were confirmed with FREEBAYES, and the GATK SNPs that were not confirmed with  
475 FREEBAYES were identified in sets of isolates with a genome-wide sequencing depth of 47.8X on  
476 average (stdev 8.2), consistent with a minimal impact of isolates sequenced at lower depth on  
477 confidence in SNP calls. High-confidence SNPs were annotated with SNPEFF v4.3 [58].

478 **Mating type and female fertility assays.** Mating type and female fertility had previously been  
479 determined [23], or were determined as previously described [59].

480 **Genealogical relationships and population subdivision.** Total-evidence genealogy was inferred  
481 with RAxML from pseudo-assembled genomic sequences (i.e. tables of SNPs converted into a  
482 fasta file using the reference sequence as a template), assuming a general time-reversible model  
483 of nucleotide substitution with the  $\Gamma$  model of rate heterogeneity. Bootstrap confidence levels were  
484 determined with 100 replicates. DAPC was performed with the ADEGENET package in R [60]. Sites  
485 with missing data were excluded. We retained the first 20 principal components, and the first six  
486 discriminant functions.

487 **Diversity and divergence.** Polymorphism and divergence statistics were calculated with EGGLIB  
488 3.0.0b10 [61], excluding sites with >30% missing data. The neutrality index was calculated as  
489  $(P_n/P_s)/(D_n/D_s)$ , where  $P_n$  and  $P_s$  are the numbers of nonsynonymous and synonymous  
490 polymorphisms, and  $D_n$  and  $D_s$  are the numbers of nonsynonymous and synonymous substitutions,  
491 respectively.  $D_n$  and  $D_s$  were calculated with GESTIMATOR [62] using the *Setaria*-infecting lineage as  
492 an outgroup.  $P_n$  and  $P_s$  were calculated with EGGLIB.

493 **Linkage disequilibrium and recombination.** The coefficient of linkage disequilibrium ( $r^2$ ) [63] was  
494 calculated with VCFTOOLS [64], excluding missing data and sites with minor allele frequencies  
495 below 10%. For all lineages, we calculated  $r^2$  between all pairs of SNPs less than 100 kb apart and  
496 averaged LD values in distance classes of 1 kb for lineages 1 and 4, and 10 kb for lineages 2 and  
497 3, to minimize noise due to low genetic diversity. Only sites without missing data and with a minor  
498 allele frequency above 10% were included, to minimize the dependence of  $r^2$  on minor allele  
499 frequency [65]. Recombination rates were estimated for each chromosome with PAIRWISE in LDHAT  
500 version 2.2 [66]. Singletons and sites with missing data were excluded.

501 **Pathogenicity tests.** We used pathotyping data for 31 isolates previously described by Gallet et  
502 al. [38]. We supplemented this dataset with pathotyping data for 27 isolates, produced by the same  
503 authors, using the same protocol, but not included in the publication due to uncertainty in the  
504 nature of the rice subspecies of origin. We used a combination of multilocus microsatellite and  
505 SNP data to assign the 58 pathotyped isolates to the six lineages, because SNP data were  
506 available for only 30 pathotyped isolates (20 of the 31 isolates from Gallet et al. and 10 of the 27  
507 additional isolates). Multilocus microsatellite genotypes at 12 loci were obtained from the Saleh et

508 al. [21] dataset, or produced as described by Saleh et al. [21]. We improved the accuracy of  
509 assignment tests by adding the 19 isolates that had been sequenced but for which no pathotyping  
510 data were available to the full dataset, which included 77 multilocus genotypes in total (58  
511 pathotyped isolates, and 19 additional non-pathotyped isolates). For 49 of the 77 isolates for which  
512 genomic data were available, we retained 1% of the SNP loci with no missing data (i.e. 164 SNPs).  
513 Missing data were introduced at SNP and microsatellite loci for the 28 non-sequenced isolates and  
514 the four sequenced isolates without microsatellite data.

515 STRUCTURE 2.3.1 program was used for assignment [67-69]. The model implemented allowed  
516 admixture and correlation in allele frequencies. Burn-in length was set at 10 000 iterations, and the  
517 burn-in period was followed by 40,000 iterations. Four independent runs were performed to check  
518 for convergence. At  $K=6$  the four main clusters identified with the full genomic dataset were  
519 recovered, although 15 of the 77 genotypes could not be assigned due to admixture or a lack of  
520 power. Finally, 46 of the 58 isolates inoculated could be assigned to lineages 1 to 4; the other 12  
521 isolates could not be assigned to a specific lineage among lineages 1, 5 and 6, and were not  
522 analyzed further (Figure S4). Infection success was analyzed with a generalized linear model with  
523 a binomial error structure and logit link function. Treatment contrasts were used to assess the  
524 specific degrees of freedom of main effects and interactions.

525 **Genome scan for genetic exchanges.** Probabilistic chromosome painting was carried out with  
526 CHROMOPAINTER version 0.0.4 [70]. This method “paints” individuals in “recipient” populations as a  
527 combination of segments from “donor” populations, using linkage information for probability  
528 computation, assuming that linked alleles are more likely to be exchanged together during  
529 recombination events. All lineages were used as donors, but only lineages 1-4 were used as  
530 recipients (sample size too small for lineages 5 and 6). We initially ran the model using increments  
531 of 50 expectation-maximization iterations, starting at 10 iterations, and examined the convergence  
532 of parameter estimates to determine how many iterations to use. Hence, the recombination scaling  
533 constant  $N_e$  and emission probabilities ( $\mu$ ) were estimated in lineages 1-4 by running the  
534 expectation-maximization algorithm with 200 iterations for each lineage and chromosome.  
535 Estimates of  $N_e$  and  $\mu$  were then calculated as averages weighted by chromosome length

536 ( $N_e=8160$  for all lineages, lineage 1;  $\mu=0.0000506$ ; lineage 2,  $\mu=0.0000171$ ; lineage 3,  
537  $\mu=0.000021$ ; lineage 4,  $\mu=0.000011$ ). These parameter values and the per-chromosome  
538 recombination rates estimated with LDHAT were then used to paint the chromosome of each  
539 lineage, considering the remaining lineages as donors, using 200 expectation-maximization  
540 iterations. We used a probability threshold of 0.9 to assign mutations in a recipient lineage to a  
541 donor lineage.

542 **Tip-calibrated phylogenetic analysis.** Tip-calibrated phylogenetic inferences were performed  
543 with only the 48 isolates for which sampling date was recorded, i.e. all isolates except the  
544 reference 70-15 and PH0018 isolates, with the exclusion of missing data. We investigated whether  
545 the signal obtained with our dataset was sufficiently high for thorough tip-dating inferences, by  
546 building a phylogenetic tree with PHYML [71], without constraining tip-heights on the basis of  
547 isolate sampling time, and then fitting root-to-tip distances (a proxy for the number of substitutions  
548 accumulated since the most recent common ancestor, TMRCA) to collection dates with TEMPEST  
549 [70]. We observed a significant positive correlation (Figure S3), demonstrating that the temporal  
550 signal was sufficiently strong for thorough tip-dating inferences at this evolutionary scale. The tip-  
551 calibrated inferences were then carried out using Markov chain-Monte Carlo sampling in BEAST  
552 1.8.2 [72]. The topology was fixed as the total-evidence genome genealogy inferred with RAXML.  
553 We used an annotation of the SNPs with SNPEFF [57] to partition Bayesian inference (i.e. several  
554 substitution models and rates of evolution were fitted to the different sets of SNPs during a single  
555 analysis). The optimal partitioning scheme and the best-fit nucleotide substitution model for each  
556 partitioning of the genome were estimated with PARTITIONFINDER software [73]. The best  
557 partitioning was obtained for  $K=3$  schemes (synonymous: HKY, non-synonymous: GTR and non-  
558 exonic SNPs: GTR) and was used for subsequent analyses. Node age was then estimated with  
559 this optimal partitioning scheme. Rate variation between sites was modeled with a discrete gamma  
560 distribution, with four rate categories. We assumed an uncorrelated lognormal relaxed clock, to  
561 account for rate variation between lineages. We minimized prior assumptions about demographic  
562 history, by adopting an extended Bayesian skyline plot approach, to integrate data over different  
563 coalescent histories. The tree was calibrated using tip-dates only. We applied flat priors (i.e.,  
564 uniform distributions) for substitution rate ( $1 \times 10^{-12} - 1 \times 10^{-2}$  substitutions/site/year) and for the

565 age of any internal node in the tree (including the root). We ran five independent chains, in which  
566 samples were drawn every 5,000 MCMC steps, from a total of 50,000,000 steps, after a discarded  
567 burn-in of 5,000,000 steps. We checked for convergence to the stationary distribution and for  
568 sufficient sampling and mixing, by inspecting posterior samples (effective sample size >200).  
569 Parameter estimation was based on samples combined from the different chains. The best-  
570 supported tree was estimated from the combined samples using the maximum clade credibility  
571 method implemented in TREEANNOTATOR.

572

573 **Functional enrichment.** Gene enrichment analysis was conducted with the R package TOPGO for  
574 GO terms, and Fisher's exact tests for enrichment in HET-domain genes, NLRs, small-secreted  
575 protein and MAX-effector genes. MAX-effector genes were obtained from de Guillen et al. [71],  
576 NLRs were as identified in Dyrka et al. [46], and small secreted proteins and HET-domain proteins  
577 were identified with Ensembl's Biomart.

578

## 579 **Acknowledgments**

580 We thank the scholars who contributed samples, François Bonnot and Romain Gallet for  
581 assistance with statistics, and the Southgreen and Migale computing facilities.

582

## 583 **Figure Captions**

584

585 **Figure 1.** Population subdivision in the sample set analyzed. (A) Total-evidence maximum  
586 likelihood genome genealogy and discriminant analysis of principal components, (B) geographic  
587 distribution of the six lineages identified, based on results presented in (A). In panel A, all nodes  
588 had more than 95% bootstrap support (100 resamplings), except for the node carrying isolates  
589 BR0026, US0098, PR0009 and MC0016 (support: 72%). On the barplot, each isolate is  
590 represented by a thick horizontal line divided into  $K$  segments indicating the isolate's estimated  
591 probability of belonging to the  $K$  assumed clusters. In panel B, diameters are proportional to the

592 number of isolates collected per site (the smallest diameter represents 1 isolate). TRJ, tropical  
593 japonica; TEJ, temperate japonica; IND, indica; HYB, hybrid; BAR, barley; ND, no data.

594

595 **Figure 2.** Proportion of compatible interactions between 46 isolates from lineages 1 to 4 of *M.*  
596 *oryzae* and 38 varieties representing three rice subspecies (B) and the proportion of R genes  
597 overcome by 36 isolates from lineages 1 to 4 of *M. oryzae* used to inoculate 19 differential lines of  
598 rice.

599 **Figure 3.** Neighbor-Net networks showing relationships between haplotypes identified on the basis  
600 of the full set of 16,370 SNPs without missing data, (A) in the whole sample set, (B) in lineage 1,  
601 (C) in lineage 2, (D) in lineage 3, (E) in lineage 4.

602

603 **Figure 4.** Genomic distribution of candidate immigrant mutations in lineages 1, 5 and 6. (A)  
604 Lineage-diagnostic mutations segregating as singletons in other lineages. (B) Lineage 1 mutations  
605 for which the most probable donor is lineage 2, 3, or 4 in probabilistic chromosome painting  
606 analysis. Lineages 5 and 6 ( $n=2$  and  $n=1$ , respectively) could not be included as recipient  
607 populations in the chromosome painting analysis due to their small sample sizes. No candidate  
608 immigrant mutations were identified in lineages 2, 3, and 4. (C) Genomic regions corresponding to  
609 series of adjacent putative migrant mutations identified with lineage-diagnostic singletons in  
610 lineage 1. Chromosomes 1 to 7, in clockwise order, with ticks at megabase intervals.

611

612 **Figure 5.** Tip-calibrated genealogy inferred by maximum-likelihood phylogenetic inference in  
613 BEAST 1.8.2, based on single-nucleotide variation in 50 *M. oryzae* genomes. Approximate historical  
614 periods are shown for context.

## 615 **Supporting information**

616 **Figure S1.** Neighbor-Net networks showing relationships between haplotypes identified on the  
617 basis of the full set of 16,370 SNPs without missing data, (A) in lineage 1, (B) in lineage 2, (C) in  
618 lineage 3, (D) in lineage 4.

619 **Figure S2.** Linkage disequilibrium ( $r^2$ ) against distance. Only SNPs of less than 100 kb and with a  
620 minor allele frequency of more than 10% are shown. Averaged values in 1 kb windows for lineages  
621 1 and 4. Averaged values in 10 kb windows for lineages 2 and 3, to minimize the noise associated  
622 with smaller sample size.

623 **Figure S3.** (A) Root-to-tip distances (mutations/site) estimated with Beast are correlated with  
624 collection date; (B) Marginal posterior densities of the substitution rates of the three data partitions  
625 (non-coding sites, nonsynonymous sites and synonymous sites), as estimated by tip-calibrated  
626 phylogenetic analysis.

627 **Figure S4.** Proportions of ancestry in  $K=6$  ancestral populations inferred with STRUCTURE  
628 program from 77 multilocus genotypes. Individuals were genotyped at 12 microsatellite loci and  
629 164 SNP loci. Each individual is represented by a bar, partitioned into  $K$  segments representing the  
630 extent to which its genome is descended from each ancestral population.

631 **Table S1.** Isolates and genome sequencing information

632 **Table S2.** Absolute divergence (dxy) per base pair between *Magnaporthe oryzae* lineages.

633 **Table S3.** Binary interactions (infection: +; no infection: -; no data: empty cell) between rice  
634 varieties from three rice subspecies (left) or rice differential lines (right) and *Magnaporthe oryzae*  
635 isolates of six lineages

636 **Table S4.** General linear model analysis of the proportion of compatible interactions (A) and  
637 contrasting results for the analysis of the proportion of compatible interactions (B).

638 **Table S5.** General linear model analysis of the proportion of R genes overcome (A) and  
639 contrasting results for the general linear model analysis of the proportion of R genes overcome (B)

640 **Table S6.** Distribution of putative migrant mutations, list of predicted genes matching putative  
641 migrant mutations and functional enrichment analysis.

642 .

643



## 644 Bibliography

- 645 1. Taylor JW, Jacobson D, Fisher M. The Evolution of Asexual Fungi: Reproduction, Speciation and  
646 Classification. *Annual Review of Phytopathology*. 1999;37:197-246. PubMed PMID: 266.
- 647 2. Gladieux P, Feurtey A, Hood ME, Snirc A, Clavel J, Dutech C, et al. The population biology of fungal  
648 invasions. *Molecular Ecology*. 2015;n/a-n/a. doi: 10.1111/mec.13028.
- 649 3. Martin MD, Vieira FG, Ho SYW, Wales N, Schubert M, Seguin-Orlando A, et al. Genomic  
650 characterization of a South American *Phytophthora* hybrid mandates reassessment of the geographic origins  
651 of *Phytophthora infestans*. *Molecular biology and evolution*. 2016;33(2):478-91.
- 652 4. Simwami SP, Khayhan K, Henk DA, Aanensen DM, Boekhout T, Hagen F, et al. Low diversity  
653 *Cryptococcus neoformans* variety *grubii* multilocus sequence types from Thailand are consistent with an  
654 ancestral African origin. *PLoS Pathog*. 2011;7(4):e1001343.
- 655 5. Ali S, Gladieux P, Rahman H, Saqib MS, Fiaz M, Ahmad H, et al. Inferring the contribution of sexual  
656 reproduction, migration and off-season survival to the temporal maintenance of microbial populations: a case  
657 study on the wheat fungal pathogen *Puccinia striiformis* f.sp *tritici*. *Molecular Ecology*. 2014;23(3):603-17.  
658 doi: Doi 10.1111/Mec.12629. PubMed PMID: WOS:000329980000010.
- 659 6. Savary S, Willocquet L, Elazegui FA, Castilla NP, Teng PS. Rice pest constraints in tropical Asia:  
660 quantification of yield losses due to rice pests in a range of production situations. *Plant disease*.  
661 2000;84(3):357-69.
- 662 7. Talbot NJ. On the trail of a cereal killer: exploring the biology of *Magnaporthe grisea*. *Annual*  
663 *Reviews in Microbiology*. 2003;57(1):177-202.
- 664 8. Gurr S, Samalova M, Fisher M. The rise and rise of emerging infectious fungi challenges food  
665 security and ecosystem health. *Fungal Biology Reviews*. 2011;25(4):181-8.
- 666 9. Valent B. Rice blast as a model system for plant pathology. *Phytopathology*. 1990;80(1):33-6.
- 667 10. Dean RA, Talbot NJ, Ebbole DJ, Farman ML, Mitchell TK, Orbach MJ, et al. The genome sequence  
668 of the rice blast fungus *Magnaporthe grisea*. *Nature*. 2005;434(7036):980-6.
- 669 11. Ebbole DJ. *Magnaporthe* as a model for understanding host-pathogen interactions. *Annu Rev*  
670 *Phytopathol*. 2007;45:437-56.
- 671 12. Chiapello H, Mallet L, Guerin C, Aguilera G, Amselem J, Kroj T, et al. Deciphering Genome Content  
672 and Evolutionary Relationships of Isolates from the Fungus *Magnaporthe oryzae* Attacking Different Host  
673 Plants. *Genome Biol Evol*. 2015;7(10):2896-912. Epub 2015/10/11. doi: 10.1093/gbe/evv187. PubMed  
674 PMID: 26454013; PubMed Central PMCID: PMC4684704.
- 675 13. Islam MT, Croll D, Gladieux P, Soanes DM, Persoons A, Bhattacharjee P, et al. Emergence of wheat  
676 blast in Bangladesh was caused by a South American lineage of *Magnaporthe oryzae*. *BMC biology*.  
677 2016;14(1):84.
- 678 14. Yoshida K, Saunders DGO, Mitsuoka C, Natsume S, Kosugi S, Saitoh H, et al. Host specialization of  
679 the blast fungus *Magnaporthe oryzae* is associated with dynamic gain and loss of genes linked to  
680 transposable elements. *BMC genomics*. 2016;17(1):1.
- 681 15. Couch BC, Fudal I, Lebrun MH, Tharreau D, Valent B, van Kim P, et al. Origins of host-specific  
682 populations of the blast pathogen *Magnaporthe oryzae* in crop domestication with subsequent expansion of  
683 pandemic clones on rice and weeds of rice. *Genetics*. 2005;170(2):613-30. Epub 2005/04/02. doi:  
684 10.1534/genetics.105.041780. PubMed PMID: 15802503; PubMed Central PMCID: PMC4684704.
- 685 16. Fuller DQ, Sato Y-I, Castillo C, Qin L, Weisskopf AR, Kingwell-Banham EJ, et al. Consilience of  
686 genetics and archaeobotany in the entangled history of rice. *Archaeological and Anthropological Sciences*.  
687 2010;2(2):115-31.
- 688 17. Diao X, Jia G. *Origin and Domestication of Foxtail Millet*. *Genetics and Genomics of Setaria*:  
689 Springer; 2017. p. 61-72.
- 690 18. Huang X, Kurata N, Wei X, Wang Z-X, Wang A, Zhao Q, et al. A map of rice genome variation  
691 reveals the origin of cultivated rice. *Nature*. 2012;490(7421):497-501.
- 692 19. Huang X, Han B. Rice domestication occurred through single origin and multiple introgressions.  
693 *Nature plants*. 2015;2:15207.
- 694 20. Choi JY, Platts AE, Fuller DQ, Wing RA, Purugganan MD. The rice paradox: Multiple origins but  
695 single domestication in Asian rice. *Molecular biology and evolution*. 2017;34(4):969-79.
- 696 21. Saleh D, Milazzo J, Adreit H, Fournier E, Tharreau D. South-East Asia is the center of origin,  
697 diversity and dispersion of the rice blast fungus, *Magnaporthe oryzae*. *The New phytologist*.  
698 2014;201(4):1440-56. Epub 2013/12/11. doi: 10.1111/nph.12627. PubMed PMID: 24320224; PubMed  
699 Central PMCID: PMC4265293.
- 700 22. Zeigler RS. Recombination in *Magnaporthe Grisea*. *Annual Review of Phytopathology*.  
701 1998;36(1):249-75. PubMed PMID: 301.
- 702 23. Saleh D, Xu P, Shen Y, Li C, Adreit H, Milazzo J, et al. Sex at the origin: an Asian population of the  
703 rice blast fungus *Magnaporthe oryzae* reproduces sexually. *Molecular Ecology*. 2012;21(6):1330-44.
- 704 24. Lu J, Tang T, Tang H, Huang J, Shi S, Wu C-I. The accumulation of deleterious mutations in rice  
705 genomes: a hypothesis on the cost of domestication. *Trends in Genetics*. 2006;22(3):126-31.

- 706 25. Glémin S, Bataillon T. A comparative view of the evolution of grasses under domestication. *New*  
707 *phytologist*. 2009;183(2):273-90.
- 708 26. Stukenbrock EH, Bataillon T, Dutheil JY, Hansen TT, Li R, Zala M, et al. The making of a new  
709 pathogen: insights from comparative population genomics of the domesticated wheat pathogen  
710 *Mycosphaerella graminicola* and its wild sister species. *Genome research*. 2011;21(12):2157-66.
- 711 27. Stukenbrock EH, Bataillon T. A population genomics perspective on the emergence and adaptation  
712 of new plant pathogens in agro-ecosystems. *PLoS pathogens*. 2012;8(9):e1002893.
- 713 28. Felsenstein J. The evolutionary advantage of recombination. *Genetics*. 1974;78(2):737-56.
- 714 29. Karasov T, Messer PW, Petrov DA. Evidence that adaptation in *Drosophila* is not limited by mutation  
715 at single sites. *PLoS genetics*. 2010;6(6):e1000924.
- 716 30. Ellison CE, Hall C, Kowbel D, Welch J, Brem RB, Glass NL, et al. Population genomics and local  
717 adaptation in wild isolates of a model microbial eukaryote. *Proceedings of the National Academy of*  
718 *Sciences*. 2011;108(7):2831-6.
- 719 31. Roper M, Ellison C, Taylor JW, Glass NL. Nuclear and genome dynamics in multinucleate  
720 ascomycete fungi. *Current biology*. 2011;21(18):R786-R93.
- 721 32. Cheeseman K, Ropars J, Renault P, Dupont J, Gouzy J, Branca A, et al. Multiple recent horizontal  
722 transfers of a large genomic region in cheese making fungi. *Nature communications*. 2014;5.
- 723 33. Gladieux P, Ropars J, Badouin H, Branca A, Aguilera G, De Vienne DM, et al. Fungal evolutionary  
724 genomics provides insight into the mechanisms of adaptive divergence in eukaryotes. *Molecular Ecology*.  
725 2014;23(4):753-73. doi: Doi 10.1111/Mec.12631. PubMed PMID: WOS:000330264000003.
- 726 34. Noguchi MT, Yasuda N, Fujita Y. Evidence of genetic exchange by parasexual recombination and  
727 genetic analysis of pathogenicity and mating type of parasexual recombinants in rice blast fungus,  
728 *Magnaporthe oryzae*. *Phytopathology*. 2006;96(7):746-50.
- 729 35. Stamatakis A. RAxML version 8: a tool for phylogenetic analysis and post-analysis of large  
730 phylogenies. *Bioinformatics*. 2014;30(9):1312-3.
- 731 36. Leaché AD, Banbury BL, Felsenstein J, Stamatakis A. Short Tree, Long Tree, Right Tree, Wrong  
732 Tree: New Acquisition Bias Corrections for Inferring SNP Phylogenies. *Systematic Biology*. 2015;64(6):1032-  
733 47.
- 734 37. Akashi H, Osada N, Ohta T. Weak selection and protein evolution. *Genetics*. 2012;192(1):15-31.
- 735 38. Gallet R, Fontaine C, Bonnot F, Milazzo J, Tertois C, Adreit H, et al. Evolution of Compatibility  
736 Range in the Rice-Magnaporthe oryzae System: An Uneven Distribution of R Genes Between Rice  
737 Subspecies. *Phytopathology*. 2016;106(4):348-54. Epub 2015/12/17. doi: 10.1094/phyto-07-15-0169-r.  
738 PubMed PMID: 26667186.
- 739 39. Giraud T, Gladieux P, Gavrillets S. Linking emergence of fungal plant diseases and ecological  
740 speciation. *Trends in Ecology and Evolution*. 2010;25(7):387-95.
- 741 40. Schulze-Lefert P, Panstruga R. A molecular evolutionary concept connecting nonhost resistance,  
742 pathogen host range, and pathogen speciation. *Trends Plant Sci*. 2011;16(3):117-25. Epub 2011/02/15. doi:  
743 10.1016/j.tplants.2011.01.001. PubMed PMID: 21317020.
- 744 41. Liao J, Huang H, Meusnier I, Adreit H, Ducasse A, Bonnot F, et al. Pathogen effectors and plant  
745 immunity determine specialization of the blast fungus to rice subspecies. *eLife*. 2016;5:e19377.
- 746 42. Bryant D, Moulton V. Neighbor-Net: An agglomerative method for the construction of phylogenetic  
747 networks. *Molecular Biology and Evolution*. 2004;21(2):255-65. doi: 10.1093/molbev/msh018. PubMed  
748 PMID: WOS:000220083300008.
- 749 43. Bruen TC, Philippe H, Bryant D. A simple and robust statistical test for detecting the presence of  
750 recombination. *Genetics*. 2006;172(4):2665-81.
- 751 44. Maddison WP, Maddison DR. Mesquite: a modular system for evolutionary analysis. Version 3.11  
752 2016. Available from: <http://mesquiteproject.org>.
- 753 45. Ardlie KG, Kruglyak L, Seielstad M. Patterns of linkage disequilibrium in the human genome. *Nature*  
754 *Reviews Genetics*. 2002;3(4):299-309.
- 755 46. Dyrka W, Lamacchia M, Durrens P, Kobe B, Daskalov A, Paoletti M, et al. Diversity and variability of  
756 NOD-like receptors in fungi. *Genome Biology and Evolution*. 2014:3137-58.
- 757 47. Saube SJ. Molecular genetics of heterokaryon incompatibility in filamentous ascomycetes.  
758 *Microbiology and molecular biology reviews*. 2000;64(3):489-502.
- 759 48. Rieux A, Balloux F. Inferences from tip-calibrated phylogenies: a review and a practical guide.  
760 *Molecular Ecology*. 2016;25(9):1911-24. doi: 10.1111/mec.13586.
- 761 49. Zhao Z. New archaeobotanic data for the study of the origins of agriculture in China. *Current*  
762 *Anthropology*. 2011;52(S4):S295-S306.
- 763 50. Castillo CC, Bellina B, Fuller DQ. Rice, beans and trade crops on the early maritime Silk Route in  
764 Southeast Asia. *Antiquity*. 2016;90(353):1255-69.
- 765 51. Fujiwara H. Search for the Origin of Rice Cultivation: The Ancient Rice Cultivation in Paddy Fields at  
766 the Cao Xie Shan Site in China. Society for Scientific Studies on Cultural Property, Miyazaki. 1996.
- 767 52. Fuller DQ, Qin L. Water management and labour in the origins and dispersal of Asian rice. *World*  
768 *Archaeology*. 2009;41(1):88-111.

- 769 53. Siddiqui IH. Water works and irrigation system in India during pre-Mughal times. *Roots and Routes*  
770 *of Development in China and India*: Brill; 2008. p. 429-54.
- 771 54. Li H, Durbin R. Fast and accurate short read alignment with Burrows–Wheeler transform.  
772 *Bioinformatics*. 2009;25(14):1754-60.
- 773 55. Li H, Handsaker B, Wysoker A, Fennell T, Ruan J, Homer N, et al. The sequence alignment/map  
774 format and SAMtools. *Bioinformatics*. 2009;25(16):2078-9.
- 775 56. McKenna A, Hanna M, Banks E, Sivachenko A, Cibulskis K, Kernysky A, et al. The Genome  
776 Analysis Toolkit: a MapReduce framework for analyzing next-generation DNA sequencing data. *Genome*  
777 *research*. 2010;20(9):1297-303.
- 778 57. Garrison E, Marth G. Haplotype-based variant detection from short-read sequencing. arXiv preprint  
779 arXiv:12073907. 2012.
- 780 58. Cingolani P, Platts A, Wang LL, Coon M, Nguyen T, Wang L, et al. A program for annotating and  
781 predicting the effects of single nucleotide polymorphisms, SnpEff: SNPs in the genome of *Drosophila*  
782 *melanogaster* strain w1118; iso-2; iso-3. *Fly*. 2012;6(2):80-92.
- 783 59. Notteghem JL, Silue D. Distribution of the mating type alleles in *Magnaporthe grisea* populations  
784 pathogenic on rice. *Phytopathology*. 1992;82(4):421-4.
- 785 60. Jombart T, Ahmed I. adegenet 1.3-1: new tools for the analysis of genome-wide SNP data.  
786 *Bioinformatics*. 2011;27(21):3070-1.
- 787 61. De Mita S, Siol M. EggLib: processing, analysis and simulation tools for population genetics and  
788 genomics. *BMC genetics*. 2012;13(1):1.
- 789 62. Thornton K. libsequence: a C++ class library for evolutionary genetic analysis. *Bioinformatics*.  
790 2003;19(17):2325-7. doi: 10.1093/bioinformatics/btg316. PubMed PMID: ISI:000186919200024.
- 791 63. Hill WG, Robertson A. Linkage disequilibrium in finite populations. *Theoretical and Applied Genetics*.  
792 1968;38(6):226-31.
- 793 64. Danecek P, Auton A, Abecasis G, Albers CA, Banks E, DePristo MA, et al. The variant call format  
794 and VCFtools. *Bioinformatics*. 2011;27(15):2156-8.
- 795 65. Amaral AJ, Megens H-J, Crooijmans RPMA, Heuven HCM, Groenen MAM. Linkage disequilibrium  
796 decay and haplotype block structure in the pig. *Genetics*. 2008;179(1):569-79.
- 797 66. Auton A, McVean G. Recombination rate estimation in the presence of hotspots. *Genome research*.  
798 2007;17(8):1219-27.
- 799 67. Pritchard JK, Stephens M, Donnelly P. Inference of Population Structure Using Multilocus Genotype  
800 Data. *Genetics*. 2000;155(2):945-59. PubMed PMID: 226.
- 801 68. Falush D, Stephens M, Pritchard JK. Inference of Population Structure Using Multilocus Genotype  
802 Data: Linked Loci and Correlated Allele Frequencies. *Genetics*. 2003;164(4):1567-87. PubMed PMID: 88.
- 803 69. Hubisz MJ, Falush D, Stephens M, Pritchard JK. Inferring weak population structure with the  
804 assistance of sample group information. *Molecular Ecology Resources*. 2009;9(5):1322-32. doi:  
805 10.1111/j.1755-0998.2009.02591.x. PubMed PMID: ISI:000268855000004.
- 806 70. Lawson DJ, Hellenthal G, Myers S, Falush D. Inference of population structure using dense  
807 haplotype data. *PLoS Genet*. 2012;8(1):e1002453.
- 808 71. de Guillen K, Ortiz-Vallejo D, Gracy J, Fournier E, Kroj T, Padilla A. Structure analysis uncovers a  
809 highly diverse but structurally conserved effector family in phytopathogenic fungi. *PLoS Pathog*.  
810 2015;11(10):e1005228.

(A)

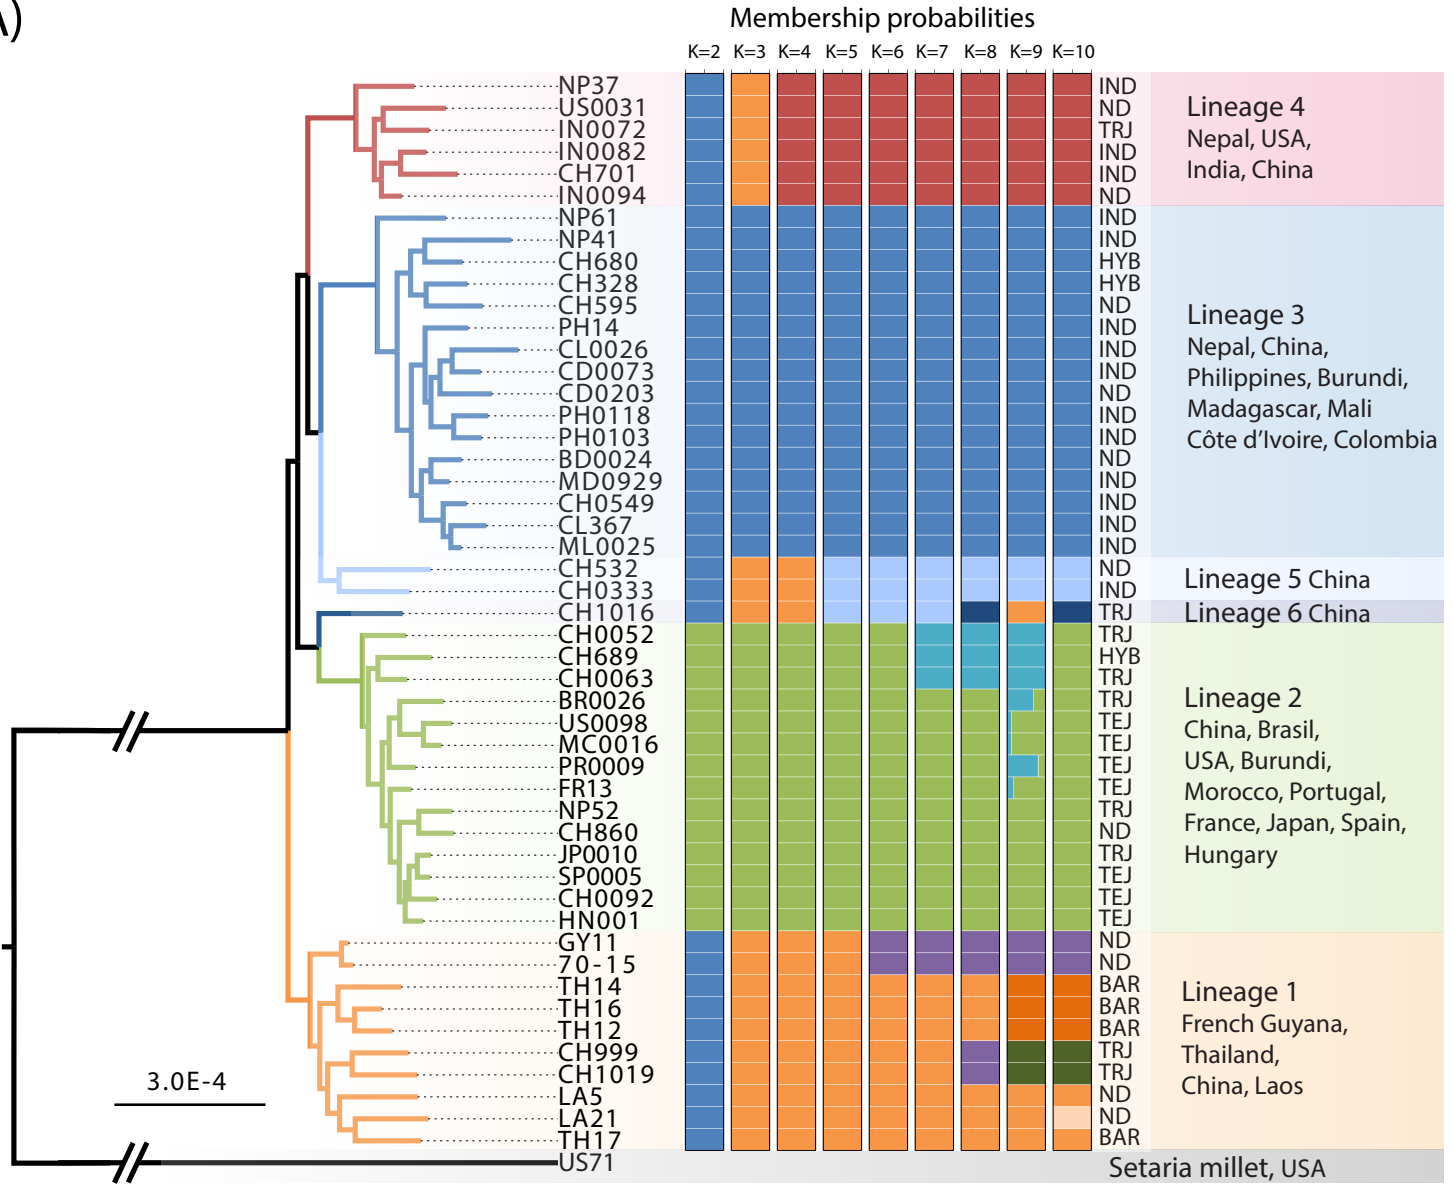

(B)

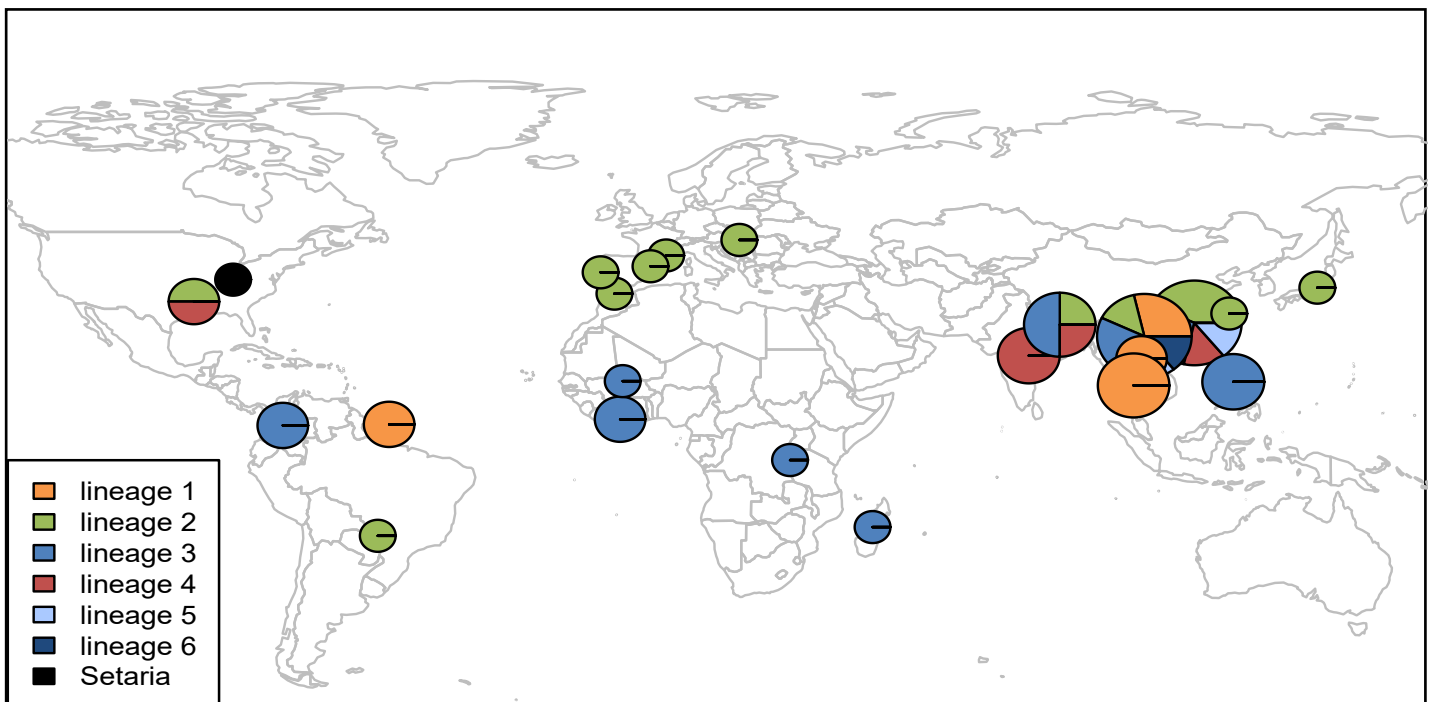

(A) Proportion of compatible interactions

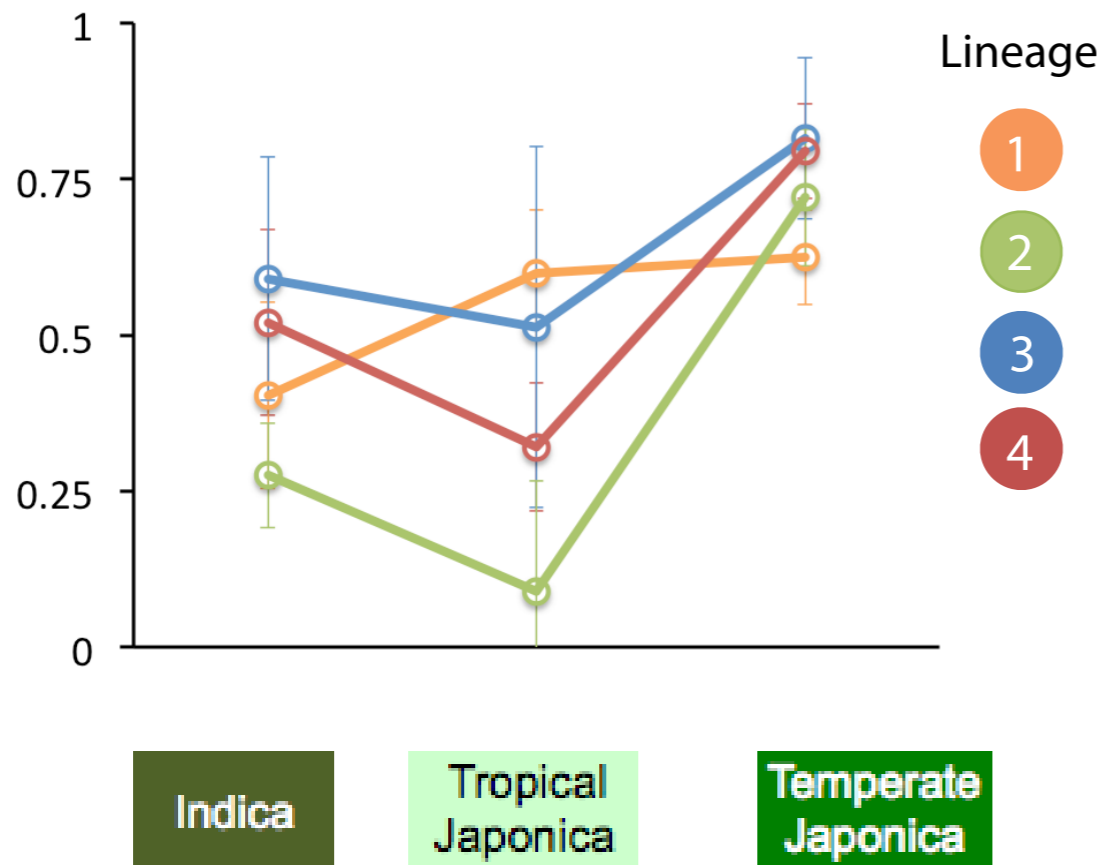

(B) Proportion of R genes overcome

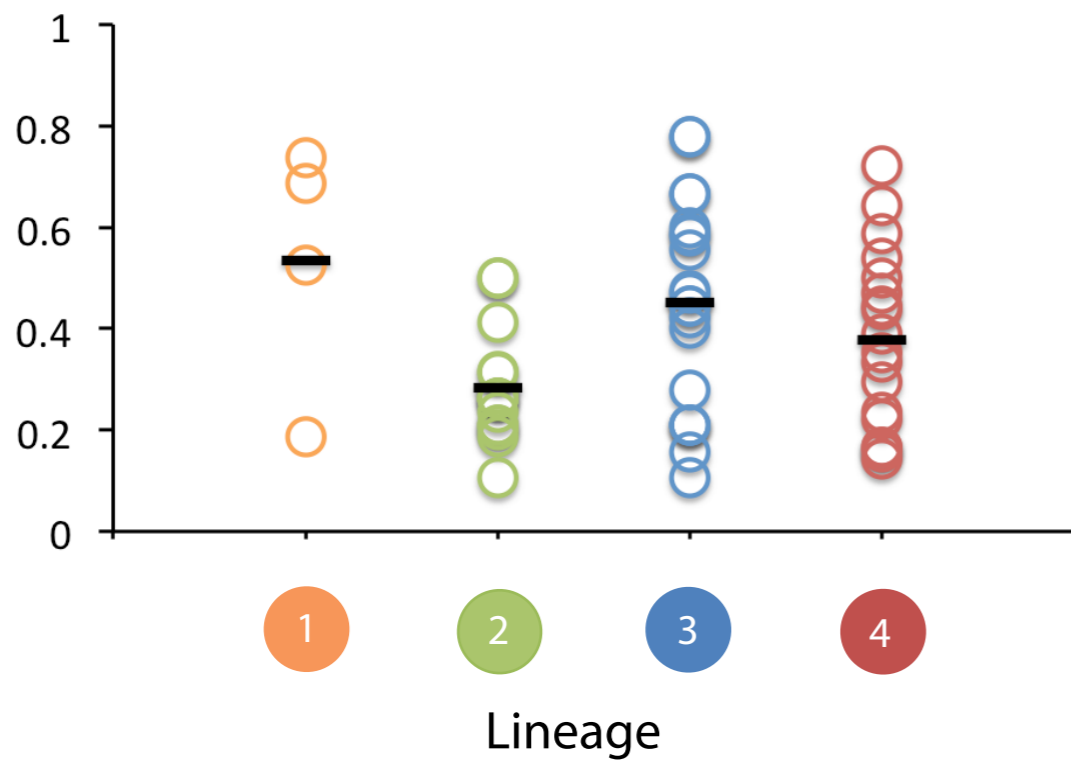

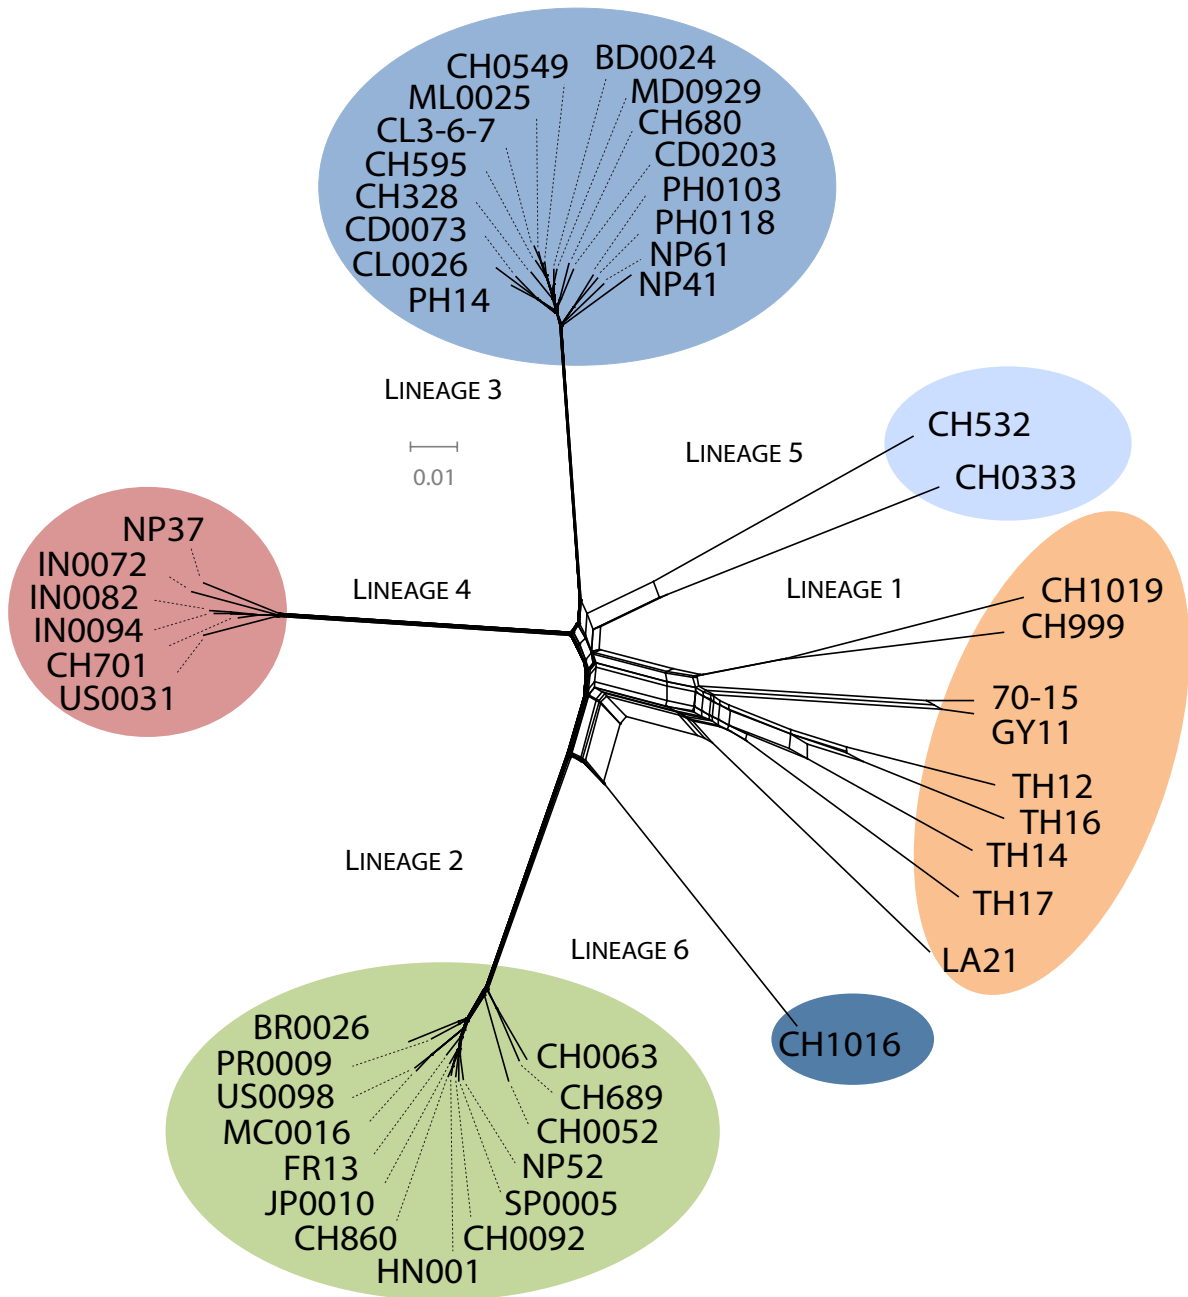

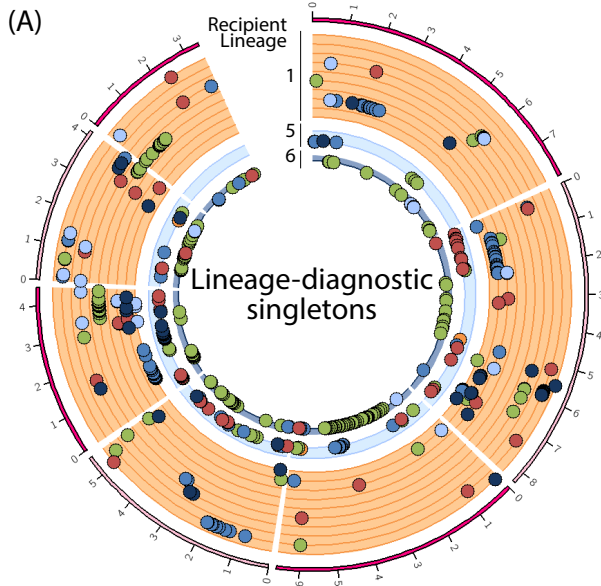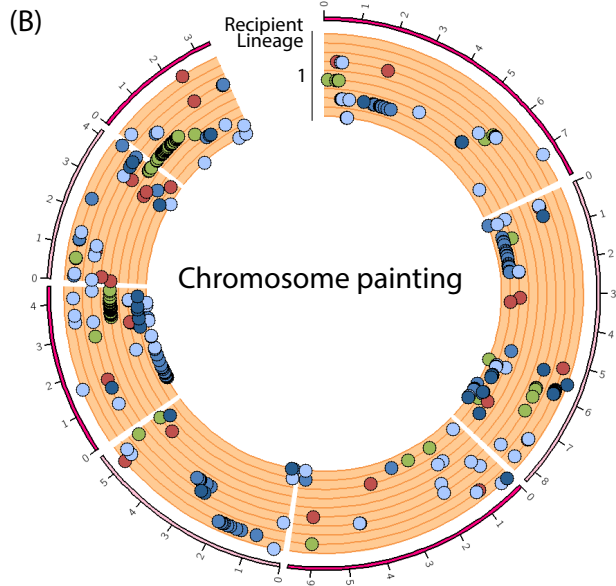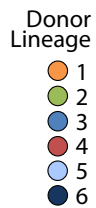

Recipient Isolates

|       |        |
|-------|--------|
| 1     | TH14   |
|       | TH17   |
|       | GY11   |
|       | LA21   |
|       | TH12   |
|       | 70-15  |
|       | TH16   |
| CH999 |        |
| 5     | CH532  |
|       | CH0333 |
| 6     | CH1016 |

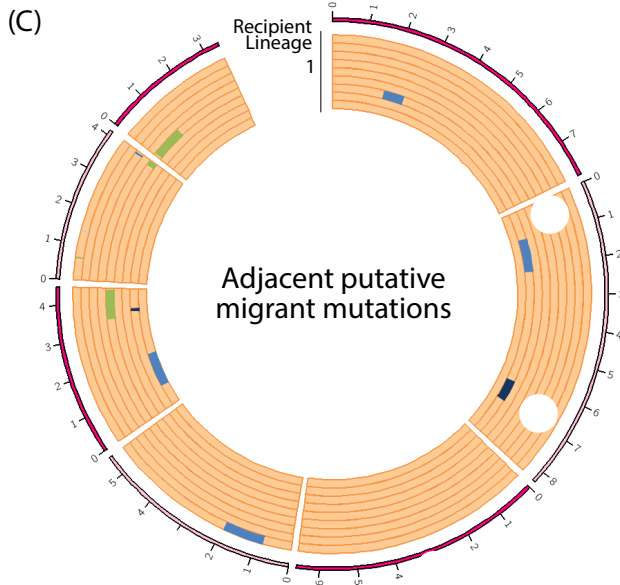

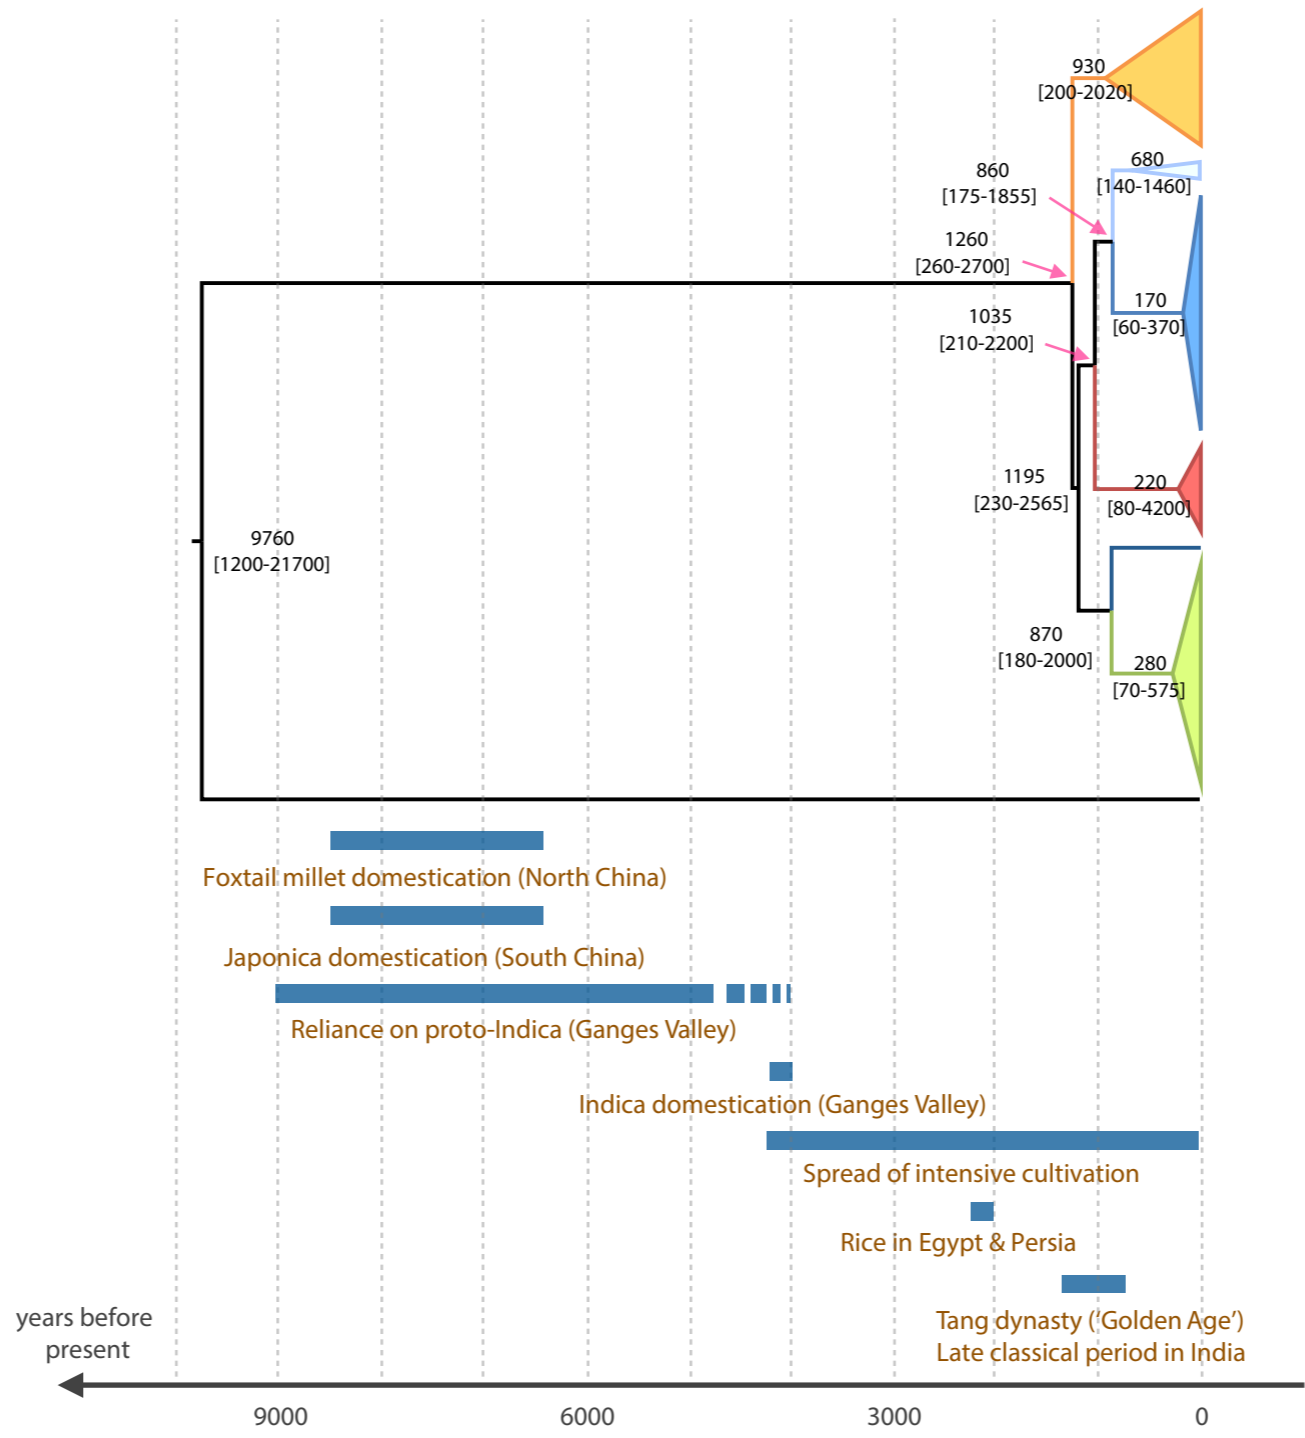

Source: http://biorxiv.org/content/10.1101/179895v4.full.pdf
